# Supplementary material for: Network Pharmacology and Experimental Verification to Unveil the Mechanism of N-Methyl-D-Aspartic Acid Rescue Humantenirine-Induced Excitotoxicity
Source: MDPI journal article supplement (doi:10.3390/metabo13020195), 2023-01-28
Supplement: s1 [file s1]

# Network pharmacology and experimental verification to unveil the mechanism of NMDA rescue humantenirine-induced excitotoxicity

Xue-Jia Qi<sup>1,2</sup>, Chong-Yin Huang<sup>1,2</sup>, Meng-Ting Zuo<sup>1,2</sup>, Meng-Die Gong<sup>1,2</sup>, Si-Juan Huang<sup>1,2</sup>, Mo-Huan Tang<sup>1,2</sup>, Zhao-Ying Liu <sup>1,2\*</sup>

1 College of Veterinary Medicine, Hunan Agricultural University, Changsha 410128, Hunan, China

2 Hunan Engineering Technology Research Center of Veterinary Drugs, Hunan Agricultural University, Changsha 410128, Hunan, China

**\* Corresponding author:** Dr. Zhao-Ying Liu,

Hunan Agricultural University,

Furong District,

Changsha 410128,

Hunan, China.

E-mail: liu\_zhaoying@hunau.edu.cn (Z.Y. Liu)

**Table S1:** The information of the alkaloids in *Gelsemium*.

| NO. | Compound                             | CID       | MW    | MF                                                            | Structure                                                                             |
|-----|--------------------------------------|-----------|-------|---------------------------------------------------------------|---------------------------------------------------------------------------------------|
| 1   | 11-Hydroxyhumantenine                | 5318224   | 370.4 | C <sub>21</sub> H <sub>26</sub> N <sub>2</sub> O <sub>4</sub> | 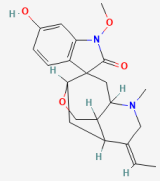   |
| 2   | 11-Hydroxyrankinidine                | 5318332   | 356.4 | C <sub>20</sub> H <sub>24</sub> N <sub>2</sub> O <sub>4</sub> |    |
| 3   | 11-Methoxy-19-(R)-Hydroxygelselegine | 5319453   | 404.5 | C <sub>21</sub> H <sub>28</sub> N <sub>2</sub> O <sub>6</sub> |    |
| 4   | 11-Methoxygelsemamide                | 5319437   | 355.4 | C <sub>21</sub> H <sub>25</sub> NO <sub>4</sub>               |   |
| 5   | 11-Methoxyhumantenine                | 44583832  | 384.5 | C <sub>22</sub> H <sub>28</sub> N <sub>2</sub> O <sub>4</sub> |  |
| 6   | 14β-Hydroxygelsedine                 | 126023    | 344.4 | C <sub>19</sub> H <sub>24</sub> N <sub>2</sub> O <sub>4</sub> |  |
| 7   | 15-Hydroxyhumantenine                | 101606434 | 370.4 | C <sub>21</sub> H <sub>26</sub> N <sub>2</sub> O <sub>4</sub> |  |
| 8   | 16-Epi-Voacarpine                    | 5317127   | 368.4 | C <sub>21</sub> H <sub>24</sub> N <sub>2</sub> O <sub>4</sub> |  |

|    |                                  |          |       |                                                               |                                                                                       |
|----|----------------------------------|----------|-------|---------------------------------------------------------------|---------------------------------------------------------------------------------------|
| 9  | 19-(R)-Hydroxydihydrogelsemine   | 5318191  | 340.4 | C <sub>20</sub> H <sub>24</sub> N <sub>2</sub> O <sub>3</sub> | 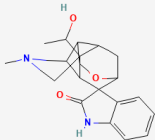   |
| 10 | 19-(R)-Hydroxydihydrogelsevirine | 5318192  | 370.4 | C <sub>21</sub> H <sub>26</sub> N <sub>2</sub> O <sub>4</sub> |    |
| 11 | 19-(R)-Hydroxydihydrokoumine     | 5318193  | 324.4 | C <sub>20</sub> H <sub>24</sub> N <sub>2</sub> O <sub>2</sub> |    |
| 12 | 19-(S)-Hydroxydihydrogelsevirine | 5318192  | 370.4 | C <sub>21</sub> H <sub>26</sub> N <sub>2</sub> O <sub>4</sub> |    |
| 13 | 19-(S)-Hydroxydihydrokoumine     | 5318193  | 324.4 | C <sub>20</sub> H <sub>24</sub> N <sub>2</sub> O <sub>2</sub> |  |
| 14 | 19-(Z)-Akuammidine               | 44583830 | 352.4 | C <sub>21</sub> H <sub>24</sub> N <sub>2</sub> O <sub>3</sub> |  |
| 15 | 19-(Z)-Taberpsychine             | 5321582  | 310.4 | C <sub>20</sub> H <sub>26</sub> N <sub>2</sub> O              |  |
| 16 | 19-Oxo-Gelsenicine               | 5320330  | 340.4 | C <sub>19</sub> H <sub>20</sub> N <sub>2</sub> O <sub>4</sub> |  |

|    |                              |           |       |                                                               |                                                                                       |
|----|------------------------------|-----------|-------|---------------------------------------------------------------|---------------------------------------------------------------------------------------|
| 17 | 20-Hydroxydihydrorankinidine | 101606432 | 358.4 | C <sub>20</sub> H <sub>26</sub> N <sub>2</sub> O <sub>4</sub> | 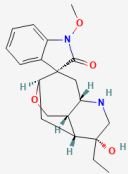   |
| 18 | Akuammidine N-Oxide          | 11268654  | 368.4 | C <sub>21</sub> H <sub>24</sub> N <sub>2</sub> O <sub>4</sub> |    |
| 19 | Akuammidinen-Oxide           | 102423744 | 368.4 | C <sub>21</sub> H <sub>24</sub> N <sub>2</sub> O <sub>4</sub> |    |
| 20 | Dihydrokoumine               | 5316727   | 308.4 | C <sub>20</sub> H <sub>24</sub> N <sub>2</sub> O              |    |
| 21 | Elegansamine                 | 5317023   | 508.6 | C <sub>29</sub> H <sub>36</sub> N <sub>2</sub> O <sub>6</sub> |  |
| 22 | Epiwilsonine                 | 5315317   | 343.4 | C <sub>20</sub> H <sub>25</sub> NO <sub>4</sub>               |  |
| 23 | Gelsamydine                  | 5317540   | 508.6 | C <sub>29</sub> H <sub>36</sub> N <sub>2</sub> O <sub>6</sub> |  |
| 24 | Gelsedine                    | 21589070  | 328.4 | C <sub>19</sub> H <sub>24</sub> N <sub>2</sub> O <sub>3</sub> |  |

|    |                         |          |       |                                                               |                                                                                       |
|----|-------------------------|----------|-------|---------------------------------------------------------------|---------------------------------------------------------------------------------------|
| 25 | Gelsemamide             | 5317542  | 340.4 | C <sub>20</sub> H <sub>24</sub> N <sub>2</sub> O <sub>3</sub> |    |
| 26 | Gelsemicine             | 5462428  | 358.4 | C <sub>20</sub> H <sub>26</sub> N <sub>2</sub> O <sub>4</sub> |    |
| 27 | Gelsemine               | 5390854  | 322.4 | C <sub>20</sub> H <sub>22</sub> N <sub>2</sub> O <sub>2</sub> |    |
| 28 | 4-(S)-Gelsemine N-Oxide | 5317545  | 338.4 | C <sub>20</sub> H <sub>22</sub> N <sub>2</sub> O <sub>3</sub> |    |
| 29 | 4-(R)-Gelsemine N-Oxide | 5317545  | 338.4 | C <sub>20</sub> H <sub>22</sub> N <sub>2</sub> O <sub>3</sub> |  |
| 30 | Gelsemoxonine           | 44583831 | 358.4 | C <sub>19</sub> H <sub>22</sub> N <sub>2</sub> O <sub>5</sub> |  |
| 31 | Gelsevirine             | 14217344 | 352.4 | C <sub>21</sub> H <sub>24</sub> N <sub>2</sub> O <sub>3</sub> |  |
| 32 | Humantenidine           | 44584549 | 342.4 | C <sub>19</sub> H <sub>22</sub> N <sub>2</sub> O <sub>4</sub> |  |

|    |                         |          |       |                                                               |                                                                                       |
|----|-------------------------|----------|-------|---------------------------------------------------------------|---------------------------------------------------------------------------------------|
| 33 | Humantenine             | 44593672 | 354.4 | C <sub>21</sub> H <sub>26</sub> N <sub>2</sub> O <sub>3</sub> | 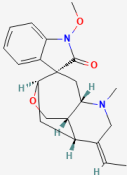   |
| 34 | Humantenirine           | 11132403 | 370.4 | C <sub>21</sub> H <sub>26</sub> N <sub>2</sub> O <sub>4</sub> |    |
| 35 | Humantenmine            | 158212   | 326.4 | C <sub>19</sub> H <sub>22</sub> N <sub>2</sub> O <sub>3</sub> |    |
| 36 | Koumidine               | 44584550 | 294.4 | C <sub>19</sub> H <sub>22</sub> N <sub>2</sub> O              |   |
| 37 | Koumine N-Oxide         | 5318847  | 322.4 | C <sub>20</sub> H <sub>22</sub> N <sub>2</sub> O <sub>2</sub> |  |
| 38 | N-Desmethoxyhumantenine | 5316593  | 324.4 | C <sub>20</sub> H <sub>24</sub> N <sub>2</sub> O <sub>2</sub> |  |
| 39 | N-Desmethoxyrankinidine | 5316594  | 310.4 | C <sub>19</sub> H <sub>22</sub> N <sub>2</sub> O <sub>2</sub> |  |
| 40 | Oxoglaucine             | 97662    | 351.4 | C <sub>20</sub> H <sub>17</sub> NO <sub>5</sub>               |  |

|    |                       |           |       |                                                                            |                                                                                       |
|----|-----------------------|-----------|-------|----------------------------------------------------------------------------|---------------------------------------------------------------------------------------|
| 41 | Rankinidine           | 6439112   | 340.4 | C <sub>20</sub> H <sub>24</sub> N <sub>2</sub> O <sub>3</sub>              | 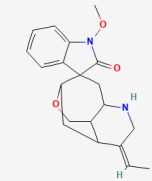   |
| 42 | Sempervirine(ii)      | 168919    | 272.3 | C <sub>19</sub> H <sub>16</sub> N <sub>2</sub>                             |    |
| 43 | Tabersonine           | 25201472  | 337.4 | C <sub>21</sub> H <sub>25</sub> N <sub>2</sub> O <sub>2</sub> <sup>+</sup> |    |
| 44 | 14-Hydroxygelsemicine | 597741    | 374.4 | C <sub>20</sub> H <sub>26</sub> N <sub>2</sub> O <sub>5</sub>              |   |
| 45 | Gelsenicine           | 21123652  | 326.4 | C <sub>19</sub> H <sub>22</sub> N <sub>2</sub> O <sub>3</sub>              |  |
| 46 | Gelegamine D          | 101467880 | 356.4 | C <sub>20</sub> H <sub>24</sub> N <sub>2</sub> O <sub>4</sub>              |  |
| 47 | Gelegamine E          | 101467881 | 370.4 | C <sub>20</sub> H <sub>22</sub> N <sub>2</sub> O <sub>5</sub>              |  |
| 48 | GS-1                  | 12070887  | 386.4 | C <sub>20</sub> H <sub>22</sub> N <sub>2</sub> O <sub>6</sub>              |  |

|    |                            |           |        |                                                               |                                                                                       |
|----|----------------------------|-----------|--------|---------------------------------------------------------------|---------------------------------------------------------------------------------------|
| 49 | GS-2                       | 12070888  | 372.4  | C <sub>20</sub> H <sub>24</sub> N <sub>2</sub> O <sub>5</sub> | 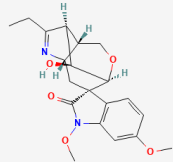   |
| 50 | 11-Hydroxygelsenicine      | 102004554 | 342.4  | C <sub>19</sub> H <sub>22</sub> N <sub>2</sub> O <sub>4</sub> |    |
| 51 | 11,14-Dihydroxygelsenicine | 101727430 | 358.4  | C <sub>19</sub> H <sub>22</sub> N <sub>2</sub> O <sub>5</sub> |    |
| 52 | 14-Hydroxygelsenicine      | 14217347  | 342.4  | C <sub>19</sub> H <sub>22</sub> N <sub>2</sub> O <sub>4</sub> |    |
| 53 | 14-Acetoxygelsenicine      | 11962104  | 384.4  | C <sub>21</sub> H <sub>24</sub> N <sub>2</sub> O <sub>5</sub> |  |
| 54 | 14,15-Dihydroxygelsenicine | 44583829  | 358.4  | C <sub>19</sub> H <sub>22</sub> N <sub>2</sub> O <sub>5</sub> |  |
| 55 | Gelsedilam                 | 102254466 | 314.34 | C <sub>17</sub> H <sub>18</sub> N <sub>2</sub> O <sub>4</sub> |  |
| 56 | Gelsecrotonidine           | 101449927 | 396.4  | C <sub>22</sub> H <sub>24</sub> N <sub>2</sub> O <sub>5</sub> |  |



|    |                                  |           |       |                                                                |                                                                                       |
|----|----------------------------------|-----------|-------|----------------------------------------------------------------|---------------------------------------------------------------------------------------|
| 57 | 14-Hydroxygelsecrotonidine       | 101449929 | 412.4 | C <sub>22</sub> H <sub>24</sub> N <sub>2</sub> O <sub>6</sub>  | 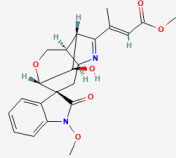   |
| 58 | 11-Methoxygelsecrotonidine       | 101449930 | 426.5 | C <sub>23</sub> H <sub>26</sub> N <sub>2</sub> O <sub>6</sub>  |    |
| 59 | 14 $\alpha$ -Hydroxygelsamydine  | 44559138  | 524.6 | C <sub>29</sub> H <sub>36</sub> N <sub>2</sub> O <sub>7</sub>  |    |
| 60 | 19 $\alpha$ -Hydroxygelsamydine  | 102003053 | 524.6 | C <sub>29</sub> H <sub>36</sub> N <sub>2</sub> O <sub>7</sub>  |   |
| 61 | Gelegamine C                     | 101467879 | 514.4 | C <sub>21</sub> H <sub>27</sub> IN <sub>2</sub> O <sub>5</sub> |  |
| 62 | 14-Acetoxygelselegine            | 101727431 | 430.5 | C <sub>23</sub> H <sub>30</sub> N <sub>2</sub> O <sub>6</sub>  |  |
| 63 | 14 $\alpha$ -Hydroxyelegansamine | 44559137  | 524.6 | C <sub>29</sub> H <sub>36</sub> N <sub>2</sub> O <sub>7</sub>  |  |
| 64 | Gelseoxazolidinine               | 102297300 | 428.5 | C <sub>23</sub> H <sub>28</sub> N <sub>2</sub> O <sub>6</sub>  |  |

|    |                             |           |       |                                                               |                                                                                       |
|----|-----------------------------|-----------|-------|---------------------------------------------------------------|---------------------------------------------------------------------------------------|
| 65 | Gelseziridine               | 101951238 | 342.4 | C <sub>19</sub> H <sub>22</sub> N <sub>2</sub> O <sub>4</sub> |    |
| 66 | GS-3                        | 101751032 | 388.4 | C <sub>20</sub> H <sub>24</sub> N <sub>2</sub> O <sub>6</sub> |    |
| 67 | Gelselenidine               | 101951237 | 368.4 | C <sub>21</sub> H <sub>24</sub> N <sub>2</sub> O <sub>4</sub> |    |
| 68 | Gelsesyringalidine          | 136704418 | 490.5 | C <sub>28</sub> H <sub>30</sub> N <sub>2</sub> O <sub>6</sub> |   |
| 69 | Gelsevanillidine            | 136811988 | 460.5 | C <sub>27</sub> H <sub>28</sub> N <sub>2</sub> O <sub>5</sub> |  |
| 70 | Gelsefuranidine             | 102254468 | 420.5 | C <sub>24</sub> H <sub>24</sub> N <sub>2</sub> O <sub>5</sub> |  |
| 71 | 14-Dehydroxygelsefuranidine | 102417029 | 404.5 | C <sub>24</sub> H <sub>24</sub> N <sub>2</sub> O <sub>4</sub> |  |
| 72 | Gelsemolenine A             | 101951239 | 384.4 | C <sub>21</sub> H <sub>24</sub> N <sub>2</sub> O <sub>5</sub> |  |

|    |                      |           |       |                                                               |                                                                                       |
|----|----------------------|-----------|-------|---------------------------------------------------------------|---------------------------------------------------------------------------------------|
| 73 | Gelsemolenine B      | 101951240 | 370.4 | C <sub>20</sub> H <sub>22</sub> N <sub>2</sub> O <sub>5</sub> | 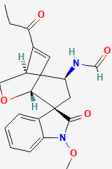   |
| 74 | Gelseiridone         | 101397829 | 538.6 | C <sub>29</sub> H <sub>34</sub> N <sub>2</sub> O <sub>8</sub> |    |
| 75 | 21-Oxogelsemine      | 11078214  | 336.4 | C <sub>20</sub> H <sub>20</sub> N <sub>2</sub> O <sub>3</sub> |    |
| 76 | 21-Oxogelsevirine    | 184299    | 366.4 | C <sub>21</sub> H <sub>22</sub> N <sub>2</sub> O <sub>4</sub> |    |
| 77 | Gelsebanine          | 16086585  | 504.6 | C <sub>30</sub> H <sub>36</sub> N <sub>2</sub> O <sub>5</sub> |  |
| 78 | 6-Hydroxyhumantenine | 101855842 | 370.4 | C <sub>21</sub> H <sub>26</sub> N <sub>2</sub> O <sub>5</sub> |  |
| 79 | 19(E)-Humantenine    | 101520842 | 354.4 | C <sub>21</sub> H <sub>26</sub> N <sub>2</sub> O <sub>3</sub> |  |
| 80 | Gelegamine A         | 101467877 | 384.4 | C <sub>21</sub> H <sub>24</sub> N <sub>2</sub> O <sub>5</sub> |  |

|    |                              |           |       |                                                               |                                                                                       |
|----|------------------------------|-----------|-------|---------------------------------------------------------------|---------------------------------------------------------------------------------------|
| 81 | Gelegamine B                 | 101467878 | 384.4 | C <sub>21</sub> H <sub>24</sub> N <sub>2</sub> O <sub>6</sub> | 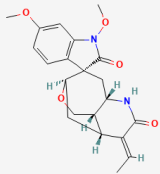   |
| 82 | Kounaminal                   | 102260292 | 363.5 | C <sub>22</sub> H <sub>25</sub> N <sub>3</sub> O <sub>2</sub> |    |
| 83 | Gelsempervine A              | 131636659 | 382.5 | C <sub>22</sub> H <sub>26</sub> N <sub>2</sub> O <sub>4</sub> |    |
| 84 | Gelsempervine B              | 101727385 | 424.5 | C <sub>24</sub> H <sub>28</sub> N <sub>2</sub> O <sub>5</sub> |   |
| 85 | Gelsempervine C              | 12444814  | 382.5 | C <sub>22</sub> H <sub>26</sub> N <sub>2</sub> O <sub>4</sub> |  |
| 86 | Gelsempervine D              | 101744809 | 424.5 | C <sub>24</sub> H <sub>28</sub> N <sub>2</sub> O <sub>5</sub> |  |
| 87 | N-Methoxyanhydrovobasinediol | 102004539 | 338.4 | C <sub>21</sub> H <sub>26</sub> N <sub>2</sub> O <sub>2</sub> |  |
| 88 | Dehydrokoumidine             | 119077162 | 292.4 | C <sub>19</sub> H <sub>20</sub> N <sub>2</sub> O              |  |

|    |                     |           |        |                                                                            |                                                                                       |
|----|---------------------|-----------|--------|----------------------------------------------------------------------------|---------------------------------------------------------------------------------------|
| 89 | Sempervilam         | 11483103  | 288.3  | C <sub>19</sub> H <sub>16</sub> N <sub>2</sub> O                           | 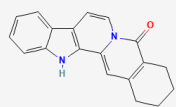   |
| 90 | Ouroparine          | 71436261  | 329.4  | C <sub>21</sub> H <sub>17</sub> N <sub>2</sub> O <sub>2</sub> <sup>+</sup> |    |
| 91 | Gelsebamine         | 16086588  | 255.35 | C <sub>14</sub> H <sub>25</sub> NO <sub>3</sub>                            |    |
| 92 | Koumine             | 91895267  | 306.4  | C <sub>20</sub> H <sub>22</sub> N <sub>2</sub> O                           |    |
| 93 | Humantendine        | 5490912   | 342.4  | C <sub>19</sub> H <sub>22</sub> N <sub>2</sub> O <sub>4</sub>              |  |
| 94 | Gelsevirine N-Oxide | 101951241 | 368.4  | C <sub>21</sub> H <sub>24</sub> N <sub>2</sub> O <sub>4</sub>              |  |

**Table S2.** The predicted targets of *Gelsemium* alkaloids.

| NO. | Targets | NO. | Targets |
|-----|---------|-----|---------|
| 1   | TLR4    | 441 | GCK     |
| 2   | CHRM3   | 442 | CAPN1   |
| 3   | DRD1    | 443 | CDK6    |
| 4   | CHRM1   | 444 | BCL2    |
| 5   | KCNA5   | 445 | RORC    |
| 6   | DRD2    | 446 | CAPN2   |
| 7   | LAP3    | 447 | ABL1    |
| 8   | PEPD    | 448 | MST1R   |
| 9   | ADRA2A  | 449 | FGFR3   |
| 10  | ADRA2C  | 450 | PLK1    |
| 11  | ADRA2B  | 451 | PRKCZ   |
| 12  | ADRA1A  | 452 | TEK     |
| 13  | SIGMAR1 | 453 | MAP3K5  |
| 14  | HDAC6   | 454 | WNK2    |
| 15  | HDAC1   | 455 | NEK1    |
| 16  | DRD3    | 456 | PLK2    |
| 17  | CHRM4   | 457 | STK38   |
| 18  | F2      | 458 | HIPK4   |
| 19  | F10     | 459 | ERN1    |
| 20  | TACR1   | 460 | OXSR1   |
| 21  | MTOR    | 461 | MAK     |
| 22  | XIAP    | 462 | STK39   |
| 23  | BIRC2   | 463 | CDKL3   |
| 24  | CHRNA4  | 464 | PIK3C2G |
| 25  | JAK1    | 465 | MAP3K6  |
| 26  | COMT    | 466 | MAP3K13 |
| 27  | HTR1B   | 467 | MAP3K15 |
| 28  | HTR1D   | 468 | MAST1   |
| 29  | CHRM5   | 469 | SBK1    |
| 30  | FDFT1   | 470 | HUNK    |
| 31  | HRH4    | 471 | CDK13   |
| 32  | ERBB2   | 472 | FLT1    |
| 33  | EGFR    | 473 | RAF1    |
| 34  | PIM1    | 474 | CASK    |
| 35  | PIM2    | 475 | SNRK    |
| 36  | PRKCD   | 476 | DSTYK   |
| 37  | PRKCQ   | 477 | FLT4    |
| 38  | BRD4    | 478 | IKBKB   |
| 39  | ACHE    | 479 | EPHA2   |
| 40  | PIK3CA  | 480 | MAP2K3  |
| 41  | HTR2C   | 481 | PRKAA2  |
| 42  | ESR1    | 482 | CCNH    |

|    |         |     |          |
|----|---------|-----|----------|
| 43 | STAT3   | 483 | CCNT1    |
| 44 | METAP2  | 484 | CYP11B2  |
| 45 | OPRM1   | 485 | STK26    |
| 46 | DPP4    | 486 | CNR2     |
| 47 | HTR6    | 487 | PFKFB3   |
| 48 | KDR     | 488 | HSD17B2  |
| 49 | PIK3CG  | 489 | EPHX1    |
| 50 | DHFR    | 490 | SCN10A   |
| 51 | HRH1    | 491 | BRS3     |
| 52 | CDK9    | 492 | NR1H4    |
| 53 | CHRNA2  | 493 | RHOA     |
| 54 | PIK3R1  | 494 | TTK      |
| 55 | SRC     | 495 | NAMPT    |
| 56 | PDE10A  | 496 | MCL1     |
| 57 | ADRB2   | 497 | AKR1C3   |
| 58 | PDE5A   | 498 | PTK2B    |
| 59 | PDE11A  | 499 | TSPO     |
| 60 | BCHE    | 500 | AOC3     |
| 61 | SCN5A   | 501 | NR4A1    |
| 62 | ADRB1   | 502 | IDH1     |
| 63 | ADRB3   | 503 | SLC27A1  |
| 64 | GRIN2B  | 504 | FNTB     |
| 65 | IRAK4   | 505 | TRPM8    |
| 66 | CHEK1   | 506 | NPY1R    |
| 67 | DRD4    | 507 | CA2      |
| 68 | HTR1A   | 508 | MAP3K14  |
| 69 | TRPV3   | 509 | CA7      |
| 70 | SLC18A3 | 510 | CA3      |
| 71 | LRRK2   | 511 | CA6      |
| 72 | SLC6A9  | 512 | CA12     |
| 73 | XPNPEP1 | 513 | CA9      |
| 74 | XPNPEP2 | 514 | NQO1     |
| 75 | PRMT6   | 515 | PARP3    |
| 76 | HTR4    | 516 | MAPKAPK2 |
| 77 | NR3C1   | 517 | CDC25A   |
| 78 | REN     | 518 | NUDT1    |
| 79 | PRMT8   | 519 | HMOX1    |
| 80 | PRMT1   | 520 | CASP1    |
| 81 | HTR2B   | 521 | CES1     |
| 82 | SYK     | 522 | CES2     |
| 83 | ZAP70   | 523 | VCAM1    |
| 84 | JAK2    | 524 | SCN9A    |
| 85 | LYN     | 525 | IMPDH2   |
| 86 | PNMT    | 526 | GLRA1    |

|     |          |     |          |
|-----|----------|-----|----------|
| 87  | ADRA1D   | 527 | GLRA2    |
| 88  | GSK3B    | 528 | PDE4B    |
| 89  | CYP2D6   | 529 | PDE7A    |
| 90  | ADRA1B   | 530 | GABRA2   |
| 91  | AKT1     | 531 | PTAFR    |
| 92  | CTSD     | 532 | KCNJ11   |
| 93  | MAPK1    | 533 | FAAH     |
| 94  | LTA4H    | 534 | CYP17A1  |
| 95  | MAP3K12  | 535 | GABRA3   |
| 96  | OGFRL1   | 536 | SGK1     |
| 97  | HRH3     | 537 | PHKG2    |
| 98  | MAPK14   | 538 | CSNK1G1  |
| 99  | ADORA2A  | 539 | CAMK4    |
| 100 | PARP1    | 540 | TLR9     |
| 101 | PTPN1    | 541 | SSTR3    |
| 102 | AURKB    | 542 | CYP1A2   |
| 103 | NOS1     | 543 | TGFBR1   |
| 104 | MAP2K1   | 544 | PI4KB    |
| 105 | RPS6KB1  | 545 | EPHB4    |
| 106 | AURKA    | 546 | KLKB1    |
| 107 | DPP7     | 547 | PGK1     |
| 108 | DPP8     | 548 | EPHB3    |
| 109 | DPP9     | 549 | KDM5A    |
| 110 | IGF1R    | 550 | KDM5B    |
| 111 | INSR     | 551 | ABCG2    |
| 112 | RET      | 552 | PARP2    |
| 113 | MET      | 553 | NUAK1    |
| 114 | NTRK2    | 554 | MIF      |
| 115 | ACVRL1   | 555 | MPI      |
| 116 | PIM3     | 556 | CSNK1A1  |
| 117 | ROS1     | 557 | CSNK1D   |
| 118 | NTRK3    | 558 | PHOSPHO1 |
| 119 | CA1      | 559 | PPP5C    |
| 120 | CA13     | 560 | TBXAS1   |
| 121 | CA5B     | 561 | PDE4C    |
| 122 | CA5A     | 562 | CCNC     |
| 123 | CA14     | 563 | CSNK1E   |
| 124 | CA4      | 564 | BDKRB2   |
| 125 | SLC22A12 | 565 | GRM1     |
| 126 | ADAM17   | 566 | NR1I3    |
| 127 | FLT3     | 567 | TAAR1    |
| 128 | CDK2     | 568 | PIP4K2C  |
| 129 | JAK3     | 569 | GRM4     |
| 130 | TYK2     | 570 | KAT2B    |



|     |         |     |         |
|-----|---------|-----|---------|
| 131 | MMP8    | 571 | GABRB2  |
| 132 | PGR     | 572 | L3MBTL3 |
| 133 | MMP13   | 573 | TLR8    |
| 134 | MMP9    | 574 | HPGD    |
| 135 | MMP14   | 575 | GRIN2A  |
| 136 | PSMB8   | 576 | CHRNE   |
| 137 | CNR1    | 577 | HNMT    |
| 138 | AR      | 578 | HSD11B2 |
| 139 | WEE1    | 579 | ARHGDIA |
| 140 | PIK3CD  | 580 | SCN4A   |
| 141 | NPY5R   | 581 | KCNMA1  |
| 142 | ALOX5   | 582 | NR1D1   |
| 143 | CPB1    | 583 | AOC1    |
| 144 | PIK3CB  | 584 | PHLPP2  |
| 145 | PIK3C2B | 585 | MC1R    |
| 146 | ESR2    | 586 | MC3R    |
| 147 | TNK2    | 587 | HTR1E   |
| 148 | PLA2G7  | 588 | CHRNA1  |
| 149 | CCNA1   | 589 | CACNA1G |
| 150 | CCNA2   | 590 | NOS3    |
| 151 | KIF11   | 591 | CHRNA1  |
| 152 | CASR    | 592 | CHRNA1  |
| 153 | PDE8B   | 593 | CHRNA1  |
| 154 | NOS2    | 594 | FUCA1   |
| 155 | CDK8    | 595 | MAN1B1  |
| 156 | ADORA1  | 596 | MAN2A1  |
| 157 | HDAC4   | 597 | TYRO3   |
| 158 | ALOX5AP | 598 | SELP    |
| 159 | PRCP    | 599 | MAP4K4  |
| 160 | UTS2R   | 600 | CDC25B  |
| 161 | BACE1   | 601 | GBA     |
| 162 | EGLN1   | 602 | MAP2K7  |
| 163 | ATAD2   | 603 | RELA    |
| 164 | GHSR    | 604 | MAP3K7  |
| 165 | PRKCG   | 605 | EHMT1   |
| 166 | PRKCA   | 606 | EHMT2   |
| 167 | PRKCB   | 607 | SLC5A2  |
| 168 | PRKCH   | 608 | CCKAR   |
| 169 | SLC18A2 | 609 | CCKBR   |
| 170 | IDO1    | 610 | NAT1    |
| 171 | ABCB1   | 611 | CTNNA1  |
| 172 | MTAP    | 612 | DUT     |
| 173 | CSF1R   | 613 | IL6ST   |
| 174 | DUSP3   | 614 | CACNA1C |

|     |          |     |          |
|-----|----------|-----|----------|
| 175 | HTR1F    | 615 | GABRA6   |
| 176 | TOP2A    | 616 | GLP1R    |
| 177 | PRKDC    | 617 | PPOX     |
| 178 | PNP      | 618 | CETP     |
| 179 | GRIN1    | 619 | EDNRB    |
| 180 | BAZ2B    | 620 | PTGS1    |
| 181 | BAZ2A    | 621 | EDNRA    |
| 182 | ALOX12   | 622 | FBP1     |
| 183 | MAPK9    | 623 | PTGER1   |
| 184 | FAP      | 624 | MYLK2    |
| 185 | MAPK11   | 625 | ERBB4    |
| 186 | KCNJ1    | 626 | PRKD1    |
| 187 | TERT     | 627 | STK17B   |
| 188 | KDM1A    | 628 | EPHA5    |
| 189 | EIF2AK3  | 629 | ABL2     |
| 190 | MMP3     | 630 | EPHA8    |
| 191 | MMP1     | 631 | SLC2A1   |
| 192 | MMP2     | 632 | ATP6AP1  |
| 193 | P2RX7    | 633 | TRAP1    |
| 194 | CHEK2    | 634 | HSP90AB1 |
| 195 | SLC6A2   | 635 | VAV1     |
| 196 | SLC6A4   | 636 | PRKCE    |
| 197 | OPRD1    | 637 | NR1I2    |
| 198 | OPRL1    | 638 | PSMB9    |
| 199 | SLC6A3   | 639 | PSMB10   |
| 200 | KCNH2    | 640 | TKT      |
| 201 | OPRK1    | 641 | SIRT2    |
| 202 | CHRNA3   | 642 | CCR3     |
| 203 | TNNC1    | 643 | MKNK2    |
| 204 | KISS1R   | 644 | SCN1A    |
| 205 | PLG      | 645 | HCN4     |
| 206 | MAOA     | 646 | HCN1     |
| 207 | CHRNA3   | 647 | METAP1   |
| 208 | CCNE2    | 648 | EIF4A1   |
| 209 | PDE9A    | 649 | NMT1     |
| 210 | PDE1C    | 650 | PTPN11   |
| 211 | NR3C2    | 651 | SLC5A1   |
| 212 | SERPINA6 | 652 | BTK      |
| 213 | SHBG     | 653 | RASGRP3  |
| 214 | SLC47A1  | 654 | TBXA2R   |
| 215 | SLC47A2  | 655 | EP300    |
| 216 | ADORA3   | 656 | KNG1     |
| 217 | CCNE1    | 657 | KLK7     |
| 218 | TNNI3    | 658 | CASP9    |

|     |         |     |         |
|-----|---------|-----|---------|
| 219 | TNNT2   | 659 | ATR     |
| 220 | CHRNA6  | 660 | PTGER3  |
| 221 | HTR3A   | 661 | EED     |
| 222 | CREBBP  | 662 | SUZ12   |
| 223 | ILK     | 663 | EZH2    |
| 224 | CXCR2   | 664 | APP     |
| 225 | NTRK1   | 665 | CDC7    |
| 226 | SPHK2   | 666 | PDE4A   |
| 227 | CXCR1   | 667 | DBF4    |
| 228 | SPHK1   | 668 | PDK1    |
| 229 | PDE3A   | 669 | MAPK3   |
| 230 | CHRNA4  | 670 | PRSS1   |
| 231 | CHRNA7  | 671 | F7      |
| 232 | CHRNA5  | 672 | RXRA    |
| 233 | HTR2A   | 673 | ADAMTS5 |
| 234 | CYP51A1 | 674 | ADAMTS4 |
| 235 | CHRNA2  | 675 | FGR     |
| 236 | PDE2A   | 676 | EPHA3   |
| 237 | FKBP1A  | 677 | DDR2    |
| 238 | TRPA1   | 678 | DDR1    |
| 239 | MDM2    | 679 | BMP1    |
| 240 | ADK     | 680 | PPARG   |
| 241 | HCRTR2  | 681 | PPARA   |
| 242 | HCRTR1  | 682 | FCER2   |
| 243 | MAPK8   | 683 | MMP7    |
| 244 | BDKRB1  | 684 | CALCRL  |
| 245 | PSEN1   | 685 | TRPV1   |
| 246 | ABCC9   | 686 | MME     |
| 247 | PER2    | 687 | PDF     |
| 248 | IRAK1   | 688 | ECE1    |
| 249 | AMPD2   | 689 | HDAC8   |
| 250 | CASP3   | 690 | TK1     |
| 251 | CLK3    | 691 | MGLL    |
| 252 | DYRK2   | 692 | ABHD6   |
| 253 | KCNK3   | 693 | HDAC2   |
| 254 | PGGT1B  | 694 | HDAC5   |
| 255 | CDK1    | 695 | HDAC7   |
| 256 | F2R     | 696 | HDAC11  |
| 257 | CRHR1   | 697 | HDAC9   |
| 258 | CFD     | 698 | HDAC10  |
| 259 | ITK     | 699 | SLC10A2 |
| 260 | CASP7   | 700 | TK2     |
| 261 | TNF     | 701 | SLC6A5  |
| 262 | NAAA    | 702 | DGAT1   |

|     |         |     |         |
|-----|---------|-----|---------|
| 263 | TNKS2   | 703 | HPGDS   |
| 264 | PIN1    | 704 | TBK1    |
| 265 | ALPL    | 705 | ELOC    |
| 266 | GSK3A   | 706 | GRK2    |
| 267 | ICMT    | 707 | PLEC    |
| 268 | TYMS    | 708 | BUB1    |
| 269 | AMPD3   | 709 | P2RY12  |
| 270 | WNT3A   | 710 | ELOB    |
| 271 | VDR     | 711 | LIPA    |
| 272 | GABRB3  | 712 | PRMT3   |
| 273 | ADORA2B | 713 | BCL2L1  |
| 274 | VHL     | 714 | MLX     |
| 275 | BRPF1   | 715 | ABCC1   |
| 276 | PPP1CA  | 716 | CSK     |
| 277 | ROCK1   | 717 | MC5R    |
| 278 | GPR88   | 718 | CHKA    |
| 279 | GPR139  | 719 | PLAT    |
| 280 | CTSV    | 720 | BIRC3   |
| 281 | CASP8   | 721 | CTSE    |
| 282 | CYP11B1 | 722 | INCENP  |
| 283 | CYP19A1 | 723 | IKBKE   |
| 284 | PDE4D   | 724 | CFTR    |
| 285 | PREP    | 725 | FGFR2   |
| 286 | TACR3   | 726 | GNRHR   |
| 287 | MERTK   | 727 | EBP     |
| 288 | ADA     | 728 | EBPL    |
| 289 | C5AR1   | 729 | GRK6    |
| 290 | FNTA    | 730 | CCR4    |
| 291 | GABRG2  | 731 | CASP6   |
| 292 | GABRA5  | 732 | RAPGEF4 |
| 293 | GABRA1  | 733 | GABRA4  |
| 294 | CXCR3   | 734 | BRAF    |
| 295 | CTSC    | 735 | AXL     |
| 296 | BRD3    | 736 | CSNK1G2 |
| 297 | ROCK2   | 737 | PLD1    |
| 298 | GRK7    | 738 | PLD2    |
| 299 | TAOK2   | 739 | PAK4    |
| 300 | CDKL5   | 740 | GPR142  |
| 301 | ICK     | 741 | POLR1A  |
| 302 | PRPF4B  | 742 | ACACB   |
| 303 | PIP5K1C | 743 | CACNA1B |
| 304 | KIT     | 744 | MRGPRX1 |
| 305 | MAP2K6  | 745 | MEN1    |
| 306 | DYRK1A  | 746 | MARK1   |

|     |         |     |          |
|-----|---------|-----|----------|
| 307 | RPS6KA3 | 747 | SAE1     |
| 308 | AKT2    | 748 | KCNQ3    |
| 309 | DAPK3   | 749 | CXCL8    |
| 310 | PDPK1   | 750 | GPBAR1   |
| 311 | RPS6KA1 | 751 | EPHX2    |
| 312 | DAPK1   | 752 | SCD      |
| 313 | PRKCI   | 753 | SLC16A1  |
| 314 | CAMK2D  | 754 | TRPC6    |
| 315 | MAP3K9  | 755 | TRPC3    |
| 316 | PRKG2   | 756 | AOC2     |
| 317 | MAP2K4  | 757 | PANK3    |
| 318 | PRKACB  | 758 | STK33    |
| 319 | PKN2    | 759 | PPIA     |
| 320 | CDK7    | 760 | GCGR     |
| 321 | DAPK2   | 761 | KCNJ5    |
| 322 | RPS6KA4 | 762 | KCNJ6    |
| 323 | HCK     | 763 | ELOVL6   |
| 324 | CDK4    | 764 | NR1H3    |
| 325 | PKN1    | 765 | KCNQ2    |
| 326 | CSNK2A1 | 766 | KCNJ3    |
| 327 | FGFR1   | 767 | UBA2     |
| 328 | PLK4    | 768 | CYP24A1  |
| 329 | CAMK2G  | 769 | CYP27B1  |
| 330 | AAK1    | 770 | GRM2     |
| 331 | MARK2   | 771 | KCNK9    |
| 332 | RPS6KA2 | 772 | VCP      |
| 333 | AURKC   | 773 | CMA1     |
| 334 | STK10   | 774 | C1R      |
| 335 | PHKG1   | 775 | MAP3K20  |
| 336 | CSNK2A2 | 776 | FRK      |
| 337 | PRKACA  | 777 | PTK6     |
| 338 | CAMK2A  | 778 | CIT      |
| 339 | SLK     | 779 | CDK19    |
| 340 | CLK4    | 780 | MAP3K19  |
| 341 | CLK1    | 781 | TNFRSF1A |
| 342 | CLK2    | 782 | ALDH1A1  |
| 343 | RPS6KA5 | 783 | ALDH3A1  |
| 344 | GAK     | 784 | PTGFR    |
| 345 | SRPK1   | 785 | PTPN7    |
| 346 | BMP2K   | 786 | KCNA3    |
| 347 | TNIK    | 787 | CTRB1    |
| 348 | HIPK2   | 788 | KCNK2    |
| 349 | HIPK3   | 789 | H1F0     |
| 350 | CDK16   | 790 | KCNQ1    |

|     |         |     |         |
|-----|---------|-----|---------|
| 351 | STK4    | 791 | PLK3    |
| 352 | STK3    | 792 | KMT5A   |
| 353 | MKNK1   | 793 | CDC25C  |
| 354 | AKT3    | 794 | GJA1    |
| 355 | MAP4K5  | 795 | NDUFC2  |
| 356 | PRKD2   | 796 | SELE    |
| 357 | RPS6KA6 | 797 | HIF1A   |
| 358 | MAP2K5  | 798 | VEGFA   |
| 359 | GRM5    | 799 | NPPB    |
| 360 | PYGL    | 800 | KCNJ8   |
| 361 | PSEN2   | 801 | KCNJ12  |
| 362 | MAPK10  | 802 | KCNJ15  |
| 363 | LIPE    | 803 | SLC18A1 |
| 364 | FPR1    | 804 | ACE     |
| 365 | FPR2    | 805 | KCNJ10  |
| 366 | CTSK    | 806 | KCNJ14  |
| 367 | CTSS    | 807 | KCNH6   |
| 368 | CCNB3   | 808 | KCNH7   |
| 369 | ELANE   | 809 | TUBB3   |
| 370 | MTNR1A  | 810 | GSR     |
| 371 | MTNR1B  | 811 | GCDH    |
| 372 | PTGES   | 812 | ERO1B   |
| 373 | BCL2A1  | 813 | IVD     |
| 374 | NQO2    | 814 | DPYD    |
| 375 | TDO2    | 815 | TUBB    |
| 376 | CCND3   | 816 | TUBB4A  |
| 377 | BRD2    | 817 | POR     |
| 378 | EIF4H   | 818 | CYB5R1  |
| 379 | PABPC1  | 819 | TUBB6   |
| 380 | P2RX3   | 820 | FDXR    |
| 381 | GSTO1   | 821 | DAO     |
| 382 | ENPP2   | 822 | TXNRD1  |
| 383 | HSD11B1 | 823 | ACADS   |
| 384 | SUMO1   | 824 | CYB5R3  |
| 385 | PSENEN  | 825 | TUBB8   |
| 386 | NCSTN   | 826 | TUBB2B  |
| 387 | APH1A   | 827 | IL4I1   |
| 388 | APH1B   | 828 | AIFM1   |
| 389 | CCND1   | 829 | TUBB4B  |
| 390 | CCND2   | 830 | ACOX1   |
| 391 | CCNB1   | 831 | TUBB2A  |
| 392 | CCNB2   | 832 | ACADM   |
| 393 | MAOB    | 833 | XDH     |
| 394 | ALK     | 834 | ACAD8   |

|     |          |     |         |
|-----|----------|-----|---------|
| 395 | DRD5     | 835 | DLD     |
| 396 | HRH2     | 836 | GFER    |
| 397 | HTR5A    | 837 | ABCC2   |
| 398 | PDGFRB   | 838 | PRKAB1  |
| 399 | MYLK     | 839 | ACVR1   |
| 400 | LCK      | 840 | ASNA1   |
| 401 | HTR7     | 841 | ADRBK2  |
| 402 | CCR1     | 842 | ACSS2   |
| 403 | SMO      | 843 | NT5C2   |
| 404 | TACR2    | 844 | AMHR2   |
| 405 | PTGS2    | 845 | ASNS    |
| 406 | SCARB1   | 846 | MAP2    |
| 407 | PSMB2    | 847 | ADRBK1  |
| 408 | PSMB1    | 848 | IMPDH1  |
| 409 | PSMB5    | 849 | PRKAA1  |
| 410 | CTSL     | 850 | CREB1   |
| 411 | OXTR     | 851 | ACSS1   |
| 412 | ADCY1    | 852 | TUBA3C  |
| 413 | HMGCR    | 853 | MAPT    |
| 414 | AVPR1A   | 854 | AFG3L2  |
| 415 | ACKR3    | 855 | TUBA1C  |
| 416 | CTSB     | 856 | CDK15   |
| 417 | CDK5R1   | 857 | HINT1   |
| 418 | CHRM2    | 858 | ASS1    |
| 419 | CCR5     | 859 | TUBA1B  |
| 420 | NCOR2    | 860 | ACVR1B  |
| 421 | LIMK1    | 861 | ACSL1   |
| 422 | PDE1B    | 862 | ABCA1   |
| 423 | FYN      | 863 | ENPP1   |
| 424 | PDGFRA   | 864 | NAE1    |
| 425 | YES1     | 865 | PRKAB2  |
| 426 | BLK      | 866 | APAF1   |
| 427 | CAMK1    | 867 | TUBB1   |
| 428 | PTK2     | 868 | TUBA4A  |
| 429 | MAP3K11  | 869 | ABCC8   |
| 430 | CDK5     | 870 | ABCB11  |
| 431 | HDAC3    | 871 | MAP4    |
| 432 | MPO      | 872 | ABCG1   |
| 433 | MCHR1    | 873 | TUBA3D  |
| 434 | HSP90AA1 | 874 | ARAF    |
| 435 | GALR1    | 875 | TUBA1A  |
| 436 | GALR2    | 876 | SLC25A4 |
| 437 | AVPR2    | 877 | TUBA3E  |
| 438 | AVPR1B   | 878 | FKBP1B  |

439

PYGM

879

FGF2

440

BACE2

---



**Table S3.** The targets related to excitotoxicity.

| NO. | Targets  | NO. | Targets   |
|-----|----------|-----|-----------|
| 1   | SLC1A2   | 388 | IGKV2D-29 |
| 2   | NOS1     | 389 | MAP2K1    |
| 3   | PRKN     | 390 | CXCR4     |
| 4   | GRIN1    | 391 | TERT      |
| 5   | MAPK8IP1 | 392 | NFKB1     |
| 6   | GRIN2B   | 393 | PTEN      |
| 7   | BDNF     | 394 | PIK3R1    |
| 8   | HTT      | 395 | VIM       |
| 9   | INPP4A   | 396 | CACNA1S   |
| 10  | PRR7     | 397 | CAMK2A    |
| 11  | GRIN2A   | 398 | ADRB1     |
| 12  | GRIA2    | 399 | GSK3B     |
| 13  | FOS      | 400 | F2        |
| 14  | APP      | 401 | SLC16A1   |
| 15  | GRIA1    | 402 | LRRK2     |
| 16  | SLC1A3   | 403 | MAP2K3    |
| 17  | RNF146   | 404 | CACNA1A   |
| 18  | DLG4     | 405 | EEF2      |
| 19  | RPS6KA5  | 406 | MAPK9     |
| 20  | SOD1     | 407 | PLA2G6    |
| 21  | FOLH1    | 408 | TP63      |
| 22  | JUN      | 409 | YY1       |
| 23  | NOS2     | 410 | ACTN2     |
| 24  | MAPK1    | 411 | CACNA1D   |
| 25  | NTRK2    | 412 | ADORA1    |
| 26  | BCL2     | 413 | CYBB      |
| 27  | CASP3    | 414 | KEAP1     |
| 28  | GDNF     | 415 | DUSP1     |
| 29  | PRKCG    | 416 | GRM3      |
| 30  | GRIN2D   | 417 | GLP1R     |
| 31  | GRM1     | 418 | TFAP2A    |
| 32  | PSEN1    | 419 | PTGS1     |
| 33  | CREB1    | 420 | LEP       |
| 34  | GRIN3A   | 421 | HSPG2     |
| 35  | CHAT     | 422 | ANXA5     |
| 36  | GRIN2C   | 423 | CASP14    |
| 37  | PIK3CG   | 424 | CACNB4    |
| 38  | PARP1    | 425 | CD59      |
| 39  | SGK1     | 426 | HMGCR     |
| 40  | TYRO3    | 427 | GRM4      |
| 41  | GPB1     | 428 | SPP1      |
| 42  | GAD1     | 429 | SHMT2     |

|    |        |     |         |
|----|--------|-----|---------|
| 43 | APOE   | 430 | OPRK1   |
| 44 | NGF    | 431 | PINK1   |
| 45 | CNR1   | 432 | MAP3K11 |
| 46 | PVALB  | 433 | PPARA   |
| 47 | BLVRB  | 434 | PIN1    |
| 48 | SLC1A1 | 435 | CACNA1F |
| 49 | TNF    | 436 | ATP2A3  |
| 50 | BAX    | 437 | DKK1    |
| 51 | FBXW7  | 438 | CDK5R1  |
| 52 | GRM5   | 439 | EEF2K   |
| 53 | CDK5   | 440 | HSF1    |
| 54 | CYCS   | 441 | FOXO3   |
| 55 | BCL2L1 | 442 | SLC1A4  |
| 56 | CNTF   | 443 | SLC6A19 |
| 57 | MAPK10 | 444 | TRPM4   |
| 58 | GAPDH  | 445 | LAMC1   |
| 59 | SLC8A1 | 446 | NONO    |
| 60 | MAPT   | 447 | IL1A    |
| 61 | GRIN3B | 448 | MDK     |
| 62 | GFAP   | 449 | TIMP1   |
| 63 | TH     | 450 | OPTN    |
| 64 | SREBF1 | 451 | PRDX3   |
| 65 | NTF3   | 452 | CACNB3  |
| 66 | FGF2   | 453 | CTSE    |
| 67 | ACHE   | 454 | CYSLTR1 |
| 68 | OGDH   | 455 | ACP1    |
| 69 | HSPA4  | 456 | ABCC5   |
| 70 | GRINA  | 457 | IL13    |
| 71 | GRIA4  | 458 | GLUD2   |
| 72 | CAMK2G | 459 | GALR2   |
| 73 | MAP2   | 460 | TSPO    |
| 74 | MTDH   | 461 | MAP3K10 |
| 75 | HDAC9  | 462 | NDUFB8  |
| 76 | NRTN   | 463 | PRL     |
| 77 | DLG3   | 464 | NPY5R   |
| 78 | PLAT   | 465 | CHKA    |
| 79 | CAPN1  | 466 | CCK     |
| 80 | LRP1   | 467 | HIP1    |
| 81 | CASP9  | 468 | GCG     |
| 82 | XDH    | 469 | HPCA    |
| 83 | GAS1   | 470 | RPS27A  |
| 84 | GLUL   | 471 | SLC38A2 |
| 85 | NTRK3  | 472 | PAWR    |
| 86 | PTGS2  | 473 | NTSR1   |

|     |           |     |         |
|-----|-----------|-----|---------|
| 87  | AIFM1     | 474 | ADGRL2  |
| 88  | VEGFA     | 475 | GPT     |
| 89  | HSPA8     | 476 | PDIA2   |
| 90  | INS       | 477 | NMNAT2  |
| 91  | IL1R1     | 478 | PPA1    |
| 92  | GRIA3     | 479 | NTS     |
| 93  | SLC24A1   | 480 | DPYSL3  |
| 94  | SLC8A3    | 481 | UBE2K   |
| 95  | CYP19A1   | 482 | ASIC2   |
| 96  | CCL2      | 483 | CD300LF |
| 97  | PIKFYVE   | 484 | KCNIP3  |
| 98  | VIP       | 485 | VGF     |
| 99  | GSR       | 486 | NDOR1   |
| 100 | NPY       | 487 | NPY4R   |
| 101 | SRR       | 488 | SACS    |
| 102 | DAO       | 489 | AVEN    |
| 103 | GRIK1     | 490 | RIMKLA  |
| 104 | ADORA2A   | 491 | MYZAP   |
| 105 | EPO       | 492 | OR4D2   |
| 106 | F5        | 493 | ADPRS   |
| 107 | FZR1      | 494 | MIR107  |
| 108 | IL1B      | 495 | RNY5    |
| 109 | AKT1      | 496 | EGFR    |
| 110 | DRD2      | 497 | MTOR    |
| 111 | NSF       | 498 | PRKCD   |
| 112 | SRC       | 499 | SLC2A1  |
| 113 | SNCA      | 500 | MMP2    |
| 114 | IGF1      | 501 | CASP8   |
| 115 | MAPK8     | 502 | EGF     |
| 116 | RYR1      | 503 | STAT3   |
| 117 | ADCYAP1   | 504 | MYC     |
| 118 | JAK2      | 505 | PRKACA  |
| 119 | KCNJ5     | 506 | PRKAA2  |
| 120 | GAD2      | 507 | NT5E    |
| 121 | TAT       | 508 | ADA     |
| 122 | CDKN3     | 509 | CYP3A4  |
| 123 | KIDINS220 | 510 | BCHE    |
| 124 | SIRT4     | 511 | ADK     |
| 125 | PLA2G2A   | 512 | DPP4    |
| 126 | CAST      | 513 | ITGB1   |
| 127 | ADCY10    | 514 | DYRK1A  |
| 128 | ITIH4     | 515 | CTH     |
| 129 | SST       | 516 | FAS     |
| 130 | TGFB1     | 517 | F10     |

|     |          |     |          |
|-----|----------|-----|----------|
| 131 | DPYSL2   | 518 | RELA     |
| 132 | SLC17A7  | 519 | WNT5A    |
| 133 | GRK2     | 520 | NR3C1    |
| 134 | TP53     | 521 | PDGFB    |
| 135 | PPARG    | 522 | PLA2G7   |
| 136 | CACNA1C  | 523 | UCHL1    |
| 137 | NTRK1    | 524 | ARG1     |
| 138 | OPRM1    | 525 | CHRM2    |
| 139 | XIAP     | 526 | CAPN3    |
| 140 | DNM1L    | 527 | DAPK1    |
| 141 | EPOR     | 528 | ACTG1    |
| 142 | IRS1     | 529 | ADRB2    |
| 143 | TGM2     | 530 | GSK3A    |
| 144 | BIRC3    | 531 | KCNQ2    |
| 145 | APAF1    | 532 | EIF4E    |
| 146 | CHRNA7   | 533 | G6PD     |
| 147 | SERPINI1 | 534 | STXBP1   |
| 148 | BIRC2    | 535 | PSEN2    |
| 149 | CX3CR1   | 536 | PIK3CB   |
| 150 | CS       | 537 | MIF      |
| 151 | IL9      | 538 | PLG      |
| 152 | GUK1     | 539 | MAOA     |
| 153 | FOSL2    | 540 | PPP2CA   |
| 154 | IL1RAPL2 | 541 | PRKACB   |
| 155 | CUL1     | 542 | WNT7A    |
| 156 | CREBBP   | 543 | CASP2    |
| 157 | FAAH     | 544 | CASP6    |
| 158 | HSP90AA1 | 545 | CACNA2D1 |
| 159 | SIRT1    | 546 | CYP2D6   |
| 160 | SPTAN1   | 547 | B2M      |
| 161 | F2R      | 548 | EDN1     |
| 162 | OPRL1    | 549 | IFNG     |
| 163 | TNFRSF1B | 550 | GABRA1   |
| 164 | BIRC5    | 551 | GLRB     |
| 165 | DRD1     | 552 | SLC6A4   |
| 166 | GRM2     | 553 | SLC12A1  |
| 167 | SERPINF1 | 554 | RIPK1    |
| 168 | GLRX     | 555 | PAK1     |
| 169 | DLG1     | 556 | P2RY12   |
| 170 | LNX1     | 557 | POMC     |
| 171 | C9orf72  | 558 | ATF6     |
| 172 | DLG2     | 559 | CYBA     |
| 173 | GRP      | 560 | DMD      |
| 174 | TAX1BP3  | 561 | CDKN1B   |

|     |         |     |          |
|-----|---------|-----|----------|
| 175 | EFS     | 562 | EDN3     |
| 176 | ESR1    | 563 | HTR2C    |
| 177 | SMPD1   | 564 | HTR3A    |
| 178 | SLC12A2 | 565 | ITPR2    |
| 179 | MYD88   | 566 | HIF1A    |
| 180 | ODC1    | 567 | HLA-A    |
| 181 | TUBB3   | 568 | IL10     |
| 182 | CAPN2   | 569 | GLRA1    |
| 183 | KNG1    | 570 | ENO1     |
| 184 | ITGAM   | 571 | GJB2     |
| 185 | PRNP    | 572 | KCNB1    |
| 186 | OTC     | 573 | HPRT1    |
| 187 | KYNU    | 574 | SPHK1    |
| 188 | NMNAT1  | 575 | PTGER3   |
| 189 | SOX2    | 576 | STX1A    |
| 190 | UCP2    | 577 | SLC25A12 |
| 191 | APOD    | 578 | SLC25A13 |
| 192 | BCL2L2  | 579 | SLC12A5  |
| 193 | EGR1    | 580 | MC1R     |
| 194 | CX3CL1  | 581 | MMP10    |
| 195 | GAP43   | 582 | NR3C2    |
| 196 | IL17A   | 583 | PC       |
| 197 | SMN1    | 584 | MBL2     |
| 198 | KCNN1   | 585 | PPP1CA   |
| 199 | HCRT    | 586 | PRKAA1   |
| 200 | NUDT6   | 587 | PRKACG   |
| 201 | KARS1   | 588 | HSPA9    |
| 202 | FGFR3   | 589 | PON1     |
| 203 | FGFR1   | 590 | WWOX     |
| 204 | FGFR2   | 591 | ABAT     |
| 205 | ADAM10  | 592 | CAMK4    |
| 206 | PTPN11  | 593 | ANGPT1   |
| 207 | PPP3CA  | 594 | DCTN1    |
| 208 | IGF2    | 595 | DCX      |
| 209 | IDE     | 596 | BCAT1    |
| 210 | SDHB    | 597 | BCAT2    |
| 211 | LMNB1   | 598 | ARHGEF2  |
| 212 | MAP2K7  | 599 | CYP1A2   |
| 213 | TGFA    | 600 | EIF4EBP1 |
| 214 | SLIT2   | 601 | EIF4G1   |
| 215 | MAP2K4  | 602 | HTR1D    |
| 216 | COX5A   | 603 | CRP      |
| 217 | AGK     | 604 | FXN      |
| 218 | CDK20   | 605 | KCNA1    |

|     |          |     |        |
|-----|----------|-----|--------|
| 219 | NES      | 606 | GAMT   |
| 220 | MT3      | 607 | PTGER4 |
| 221 | MSBP1    | 608 | SETD2  |
| 222 | ADAM17   | 609 | SLC5A6 |
| 223 | SLC9A1   | 610 | TGM1   |
| 224 | ALOX5    | 611 | VIPR1  |
| 225 | TNFRSF1A | 612 | TKT    |
| 226 | BACE1    | 613 | SLC4A4 |
| 227 | ENO2     | 614 | PDE10A |
| 228 | SIGMAR1  | 615 | PML    |
| 229 | ADORA3   | 616 | MC4R   |
| 230 | CCNB1    | 617 | NEFH   |
| 231 | MST1     | 618 | UBE2N  |
| 232 | OPRD1    | 619 | UBE2I  |
| 233 | UBE2L3   | 620 | VDAC1  |
| 234 | APLNR    | 621 | WFS1   |
| 235 | DUSP3    | 622 | WNT1   |
| 236 | NTF4     | 623 | ARG2   |
| 237 | OPA1     | 624 | BECN1  |
| 238 | TNR      | 625 | CALM1  |
| 239 | JUNB     | 626 | C1QB   |
| 240 | ZFYVE9   | 627 | CAPN5  |
| 241 | SERPINE2 | 628 | CYP2E1 |
| 242 | ARTN     | 629 | BAD    |
| 243 | CXCL16   | 630 | ADARB1 |
| 244 | VRK3     | 631 | AKAP9  |
| 245 | LSM2     | 632 | CYP2J2 |
| 246 | HSPA14   | 633 | FUS    |
| 247 | PSPN     | 634 | HTR1B  |
| 248 | APLN     | 635 | HTR4   |
| 249 | LYN      | 636 | KIF5B  |
| 250 | CCNE1    | 637 | KMO    |
| 251 | GHSR     | 638 | KCNN3  |
| 252 | HCN2     | 639 | KITLG  |
| 253 | PRKCB    | 640 | CSPG4  |
| 254 | PARP2    | 641 | HRH2   |
| 255 | TNKS     | 642 | S100B  |
| 256 | CLN3     | 643 | SP1    |
| 257 | TNKS2    | 644 | PXN    |
| 258 | USF1     | 645 | VAPB   |
| 259 | CCNA1    | 646 | TIMP3  |
| 260 | S100A6   | 647 | SUMO1  |
| 261 | SKP1     | 648 | SRD5A1 |
| 262 | PARP4    | 649 | PDE4A  |

|     |         |     |           |
|-----|---------|-----|-----------|
| 263 | RBX1    | 650 | PTPN3     |
| 264 | ACMSD   | 651 | PPP2R2B   |
| 265 | PARP3   | 652 | PON2      |
| 266 | TMEM147 | 653 | PON3      |
| 267 | CALB1   | 654 | VAMP1     |
| 268 | GLS     | 655 | BAK1      |
| 269 | SLC7A11 | 656 | DGKZ      |
| 270 | GRIK2   | 657 | ATN1      |
| 271 | FYN     | 658 | AKR1A1    |
| 272 | PTGER1  | 659 | ALOX12    |
| 273 | MAPK14  | 660 | COX10     |
| 274 | GLUD1   | 661 | CALCA     |
| 275 | PRKCA   | 662 | S100A4    |
| 276 | MEF2A   | 663 | SLC18A3   |
| 277 | NDUFS4  | 664 | SOCS1     |
| 278 | GCDH    | 665 | SLC1A5    |
| 279 | HSPA5   | 666 | PDGFA     |
| 280 | CALB2   | 667 | PANX1     |
| 281 | SLC1A6  | 668 | UBE2D2    |
| 282 | BCL2L11 | 669 | UBE2G2    |
| 283 | GRIK3   | 670 | CAMK1     |
| 284 | PICK1   | 671 | CNP       |
| 285 | SLC24A3 | 672 | DDAH2     |
| 286 | DUSP19  | 673 | ATXN1     |
| 287 | DNAH8   | 674 | DNASE1    |
| 288 | CAT     | 675 | EEF1A1    |
| 289 | CBS     | 676 | CDKL5     |
| 290 | ESR2    | 677 | ARRB1     |
| 291 | SLC2A3  | 678 | GABARAPL2 |
| 292 | MTHFR   | 679 | GRIP1     |
| 293 | ANXA2   | 680 | HRH3      |
| 294 | ATP7A   | 681 | SP3       |
| 295 | CNR2    | 682 | TGM3      |
| 296 | MEF2D   | 683 | SOCS3     |
| 297 | PDYN    | 684 | SLC39A4   |
| 298 | GAL     | 685 | SNAP23    |
| 299 | RET     | 686 | MYOC      |
| 300 | CTSB    | 687 | NRXN3     |
| 301 | PLA2G4A | 688 | MAP3K13   |
| 302 | SCN1A   | 689 | MC3R      |
| 303 | P4HB    | 690 | PPP1R1B   |
| 304 | NGFR    | 691 | PROCR     |
| 305 | PARK7   | 692 | VAMP2     |
| 306 | BMP6    | 693 | BAG1      |

|     |         |     |           |
|-----|---------|-----|-----------|
| 307 | CRH     | 694 | AGRP      |
| 308 | GRIK4   | 695 | GABARAPL1 |
| 309 | NPTX1   | 696 | CREM      |
| 310 | PTPA    | 697 | FLOT1     |
| 311 | MMP9    | 698 | STX4      |
| 312 | CTNNB1  | 699 | RRAS      |
| 313 | CASP1   | 700 | PSMC4     |
| 314 | MAPK3   | 701 | SSTR5     |
| 315 | TF      | 702 | RHOT1     |
| 316 | NFE2L2  | 703 | SPTBN2    |
| 317 | MEF2C   | 704 | NDP       |
| 318 | PTGER2  | 705 | PTN       |
| 319 | RYR2    | 706 | TRAK1     |
| 320 | GRM7    | 707 | TRPM2     |
| 321 | FGF1    | 708 | CAPNS1    |
| 322 | SCN2A   | 709 | ATXN7     |
| 323 | TARDBP  | 710 | KIF5C     |
| 324 | HMGB1   | 711 | KLF13     |
| 325 | SYP     | 712 | EDN2      |
| 326 | CHRNE   | 713 | GOPC      |
| 327 | ENDOG   | 714 | STX1B     |
| 328 | SLC1A7  | 715 | PSMC6     |
| 329 | RYR3    | 716 | SLC17A6   |
| 330 | PTPN5   | 717 | NFIL3     |
| 331 | CHPT1   | 718 | MPP1      |
| 332 | DPYSL4  | 719 | PLEK      |
| 333 | NAALAD2 | 720 | MCF2      |
| 334 | HMOX1   | 721 | LGALS8    |
| 335 | JAK3    | 722 | NLRX1     |
| 336 | NOS3    | 723 | OLIG2     |
| 337 | SLC6A3  | 724 | AOC1      |
| 338 | SOD2    | 725 | CXCL8     |
| 339 | MME     | 726 | DBN1      |
| 340 | APOA1   | 727 | CRIPT     |
| 341 | CASP7   | 728 | MARCKS    |
| 342 | CP      | 729 | PARG      |
| 343 | CACNA1B | 730 | BTG2      |
| 344 | IL1RN   | 731 | HAP1      |
| 345 | ITPR1   | 732 | SLC7A10   |
| 346 | IL6     | 733 | ZDHHC17   |
| 347 | SNAP25  | 734 | TLN2      |
| 348 | TUBB    | 735 | MPP2      |
| 349 | HTR2A   | 736 | MANF      |
| 350 | HTR1A   | 737 | NDRG2     |



|     |          |     |              |
|-----|----------|-----|--------------|
| 351 | GPHN     | 738 | UNC5D        |
| 352 | NCAM1    | 739 | DBP          |
| 353 | P2RX7    | 740 | FIS1         |
| 354 | PRKAB1   | 741 | REG3A        |
| 355 | AQP4     | 742 | PLSCR3       |
| 356 | CALM2    | 743 | TPPP3        |
| 357 | CAMKK2   | 744 | ZNF326       |
| 358 | CLU      | 745 | CARD16       |
| 359 | HRH1     | 746 | RILPL1       |
| 360 | ANG      | 747 | SCT          |
| 361 | ALS2     | 748 | BCL2L15      |
| 362 | CHRNA1   | 749 | H1-2         |
| 363 | B3GAT1   | 750 | KYAT1        |
| 364 | KCNN2    | 751 | SLC38A6      |
| 365 | GFRA1    | 752 | RIMKLB       |
| 366 | IDO1     | 753 | MT-CO2       |
| 367 | TRPM7    | 754 | NECAB1       |
| 368 | APLP2    | 755 | H3-4         |
| 369 | CACNB1   | 756 | ICE2         |
| 370 | GRIK5    | 757 | MT-ND1       |
| 371 | TACR2    | 758 | POLR2M       |
| 372 | MAOB     | 759 | H1-1         |
| 373 | QPRT     | 760 | SELENOS      |
| 374 | TAC1     | 761 | UTP20        |
| 375 | CIDEA    | 762 | ATP5IF1      |
| 376 | SETX     | 763 | ATP5MF       |
| 377 | LRRC8A   | 764 | CCL3L1       |
| 378 | NAIP     | 765 | MIR21        |
| 379 | AADAT    | 766 | MIR132       |
| 380 | ATCAY    | 767 | MIR30A       |
| 381 | LRRFIP1  | 768 | LINC02141    |
| 382 | NDNF     | 769 | LOC110806262 |
| 383 | NAALADL1 | 770 | LOC108663993 |
| 384 | PATJ     | 771 | LOC108660406 |
| 385 | GCOM1    | 772 | LOC109504728 |
| 386 | MIR142   | 773 | REST         |
| 387 | MT-RNR2  | 774 | ANKK1        |

---

**Table S4.** The GO analysis of 214 interseptive targets based on the P-value<0.01.

| NO. | Category | Term                                                                                                   | Count | P-value  |
|-----|----------|--------------------------------------------------------------------------------------------------------|-------|----------|
| 1   | BP       | GO:0006468~protein phosphorylation                                                                     | 48    | 3.01E-30 |
| 2   | BP       | GO:0007268~chemical synaptic transmission                                                              | 32    | 1.58E-23 |
| 3   | BP       | GO:0018105~peptidyl-serine phosphorylation                                                             | 28    | 6.68E-23 |
| 4   | BP       | GO:0001666~response to hypoxia                                                                         | 27    | 1.36E-21 |
| 5   | BP       | GO:0018108~peptidyl-tyrosine phosphorylation                                                           | 23    | 2.02E-19 |
| 6   | BP       | GO:0046777~protein autophosphorylation                                                                 | 25    | 3.13E-19 |
| 7   | BP       | GO:0060079~excitatory postsynaptic potential                                                           | 17    | 8.45E-18 |
| 8   | BP       | GO:0007187~G-protein coupled receptor signaling pathway, coupled to cyclic nucleotide second messenger | 17    | 1.11E-17 |
| 9   | BP       | GO:0007611~learning or memory                                                                          | 17    | 1.45E-17 |
| 10  | BP       | GO:0042493~response to drug                                                                            | 28    | 2.21E-17 |
| 11  | BP       | GO:0007568~aging                                                                                       | 23    | 2.99E-16 |
| 12  | BP       | GO:0007165~signal transduction                                                                         | 52    | 3.71E-16 |
| 13  | BP       | GO:0043410~positive regulation of MAPK cascade                                                         | 21    | 1.17E-15 |
| 14  | BP       | GO:0018107~peptidyl-threonine phosphorylation                                                          | 16    | 1.41E-15 |
| 15  | BP       | GO:0035556~intracellular signal transduction                                                           | 31    | 2.69E-15 |
| 16  | BP       | GO:0009410~response to xenobiotic stimulus                                                             | 24    | 2.95E-15 |
| 17  | BP       | GO:0043525~positive regulation of neuron apoptotic process                                             | 15    | 6.21E-15 |
| 18  | BP       | GO:0070374~positive regulation of ERK1 and ERK2 cascade                                                | 23    | 9.86E-15 |
| 19  | BP       | GO:0010628~positive regulation of gene expression                                                      | 32    | 1.33E-14 |
| 20  | BP       | GO:0006954~inflammatory response                                                                       | 29    | 1.45E-14 |
| 21  | BP       | GO:0019233~sensory perception of pain                                                                  | 14    | 2.48E-14 |
| 22  | BP       | GO:0043065~positive regulation of apoptotic process                                                    | 26    | 3.27E-14 |
| 23  | BP       | GO:0045471~response to ethanol                                                                         | 18    | 1.17E-13 |
| 24  | BP       | GO:0032496~response to lipopolysaccharide                                                              | 19    | 1.31E-13 |
| 25  | BP       | GO:0010629~negative regulation of gene expression                                                      | 24    | 5.70E-13 |
| 26  | BP       | GO:0033138~positive regulation of peptidyl-serine phosphorylation                                      | 15    | 1.35E-12 |
| 27  | BP       | GO:0051402~neuron apoptotic process                                                                    | 14    | 1.49E-12 |
| 28  | BP       | GO:0043406~positive regulation of MAP kinase activity                                                  | 14    | 4.22E-12 |
| 29  | BP       | GO:0001934~positive regulation of protein phosphorylation                                              | 19    | 1.98E-11 |

|    |    |                                                                                    |    |          |
|----|----|------------------------------------------------------------------------------------|----|----------|
| 30 | BP | GO:0007200~phospholipase C-activating G-protein coupled receptor signaling pathway | 12 | 1.24E-10 |
| 31 | BP | GO:0042752~regulation of circadian rhythm                                          | 12 | 1.48E-10 |
| 32 | BP | GO:0051897~positive regulation of protein kinase B signaling                       | 15 | 1.53E-10 |
| 33 | BP | GO:0008542~visual learning                                                         | 11 | 1.55E-10 |
| 34 | BP | GO:0043536~positive regulation of blood vessel endothelial cell migration          | 11 | 1.55E-10 |
| 35 | BP | GO:0006915~apoptotic process                                                       | 29 | 1.69E-10 |
| 36 | BP | GO:0043066~negative regulation of apoptotic process                                | 27 | 1.83E-10 |
| 37 | BP | GO:2000300~regulation of synaptic vesicle exocytosis                               | 11 | 2.86E-10 |
| 38 | BP | GO:0048661~positive regulation of smooth muscle cell proliferation                 | 12 | 2.86E-10 |
| 39 | BP | GO:0035094~response to nicotine                                                    | 10 | 4.25E-10 |
| 40 | BP | GO:0000187~activation of MAPK activity                                             | 12 | 4.57E-10 |
| 41 | BP | GO:0071276~cellular response to cadmium ion                                        | 10 | 5.40E-10 |
| 42 | BP | GO:0097190~apoptotic signaling pathway                                             | 12 | 7.15E-10 |
| 43 | BP | GO:0048511~rhythmic process                                                        | 12 | 8.26E-10 |
| 44 | BP | GO:1901216~positive regulation of neuron death                                     | 10 | 8.52E-10 |
| 45 | BP | GO:0000165~MAPK cascade                                                            | 14 | 1.78E-09 |
| 46 | BP | GO:0014068~positive regulation of phosphatidylinositol 3-kinase signaling          | 12 | 1.88E-09 |
| 47 | BP | GO:1904646~cellular response to beta-amyloid                                       | 10 | 1.98E-09 |
| 48 | BP | GO:0043524~negative regulation of neuron apoptotic process                         | 15 | 2.52E-09 |
| 49 | BP | GO:0051966~regulation of synaptic transmission, glutamatergic                      | 9  | 2.79E-09 |
| 50 | BP | GO:0071260~cellular response to mechanical stimulus                                | 12 | 3.14E-09 |
| 51 | BP | GO:0007613~memory                                                                  | 12 | 3.14E-09 |
| 52 | BP | GO:0045821~positive regulation of glycolytic process                               | 8  | 5.42E-09 |
| 53 | BP | GO:0034614~cellular response to reactive oxygen species                            | 9  | 5.76E-09 |
| 54 | BP | GO:0045907~positive regulation of vasoconstriction                                 | 9  | 7.23E-09 |
| 55 | BP | GO:0090398~cellular senescence                                                     | 10 | 7.23E-09 |
| 56 | BP | GO:0042220~response to cocaine                                                     | 9  | 9.01E-09 |
| 57 | BP | GO:0042981~regulation of apoptotic process                                         | 17 | 1.12E-08 |
| 58 | BP | GO:0045776~negative regulation of blood pressure                                   | 8  | 2.33E-08 |

|    |    |                                                                                             |    |          |
|----|----|---------------------------------------------------------------------------------------------|----|----------|
| 59 | BP | GO:0006919~activation of cysteine-type endopeptidase activity involved in apoptotic process | 11 | 2.37E-08 |
| 60 | BP | GO:0007204~positive regulation of cytosolic calcium ion concentration                       | 14 | 2.50E-08 |
| 61 | BP | GO:0007169~transmembrane receptor protein tyrosine kinase signaling pathway                 | 13 | 2.68E-08 |
| 62 | BP | GO:0030335~positive regulation of cell migration                                            | 17 | 2.79E-08 |
| 63 | BP | GO:0071222~cellular response to lipopolysaccharide                                          | 15 | 3.29E-08 |
| 64 | BP | GO:0051968~positive regulation of synaptic transmission, glutamatergic                      | 8  | 3.85E-08 |
| 65 | BP | GO:0032355~response to estradiol                                                            | 12 | 4.63E-08 |
| 66 | BP | GO:0008284~positive regulation of cell proliferation                                        | 24 | 4.81E-08 |
| 67 | BP | GO:0071456~cellular response to hypoxia                                                     | 13 | 5.18E-08 |
| 68 | BP | GO:0045429~positive regulation of nitric oxide biosynthetic process                         | 9  | 6.00E-08 |
| 69 | BP | GO:0048013~ephrin receptor signaling pathway                                                | 9  | 8.32E-08 |
| 70 | BP | GO:0045893~positive regulation of transcription, DNA-templated                              | 27 | 1.06E-07 |
| 71 | BP | GO:0007189~adenylate cyclase-activating G-protein coupled receptor signaling pathway        | 12 | 2.16E-07 |
| 72 | BP | GO:0097194~execution phase of apoptosis                                                     | 7  | 2.54E-07 |
| 73 | BP | GO:0045766~positive regulation of angiogenesis                                              | 13 | 2.94E-07 |
| 74 | BP | GO:0007254~JNK cascade                                                                      | 9  | 3.07E-07 |
| 75 | BP | GO:0050966~detection of mechanical stimulus involved in sensory perception of pain          | 6  | 4.34E-07 |
| 76 | BP | GO:0042307~positive regulation of protein import into nucleus                               | 8  | 4.97E-07 |
| 77 | BP | GO:0009636~response to toxic substance                                                      | 10 | 5.09E-07 |
| 78 | BP | GO:1901215~negative regulation of neuron death                                              | 9  | 5.11E-07 |
| 79 | BP | GO:0042177~negative regulation of protein catabolic process                                 | 8  | 5.83E-07 |
| 80 | BP | GO:0042755~eating behavior                                                                  | 7  | 6.56E-07 |
| 81 | BP | GO:0006508~proteolysis                                                                      | 19 | 7.36E-07 |
| 82 | BP | GO:0030163~protein catabolic process                                                        | 9  | 8.22E-07 |
| 83 | BP | GO:0019722~calcium-mediated signaling                                                       | 10 | 8.22E-07 |
| 84 | BP | GO:0048143~astrocyte activation                                                             | 6  | 8.77E-07 |
| 85 | BP | GO:0001764~neuron migration                                                                 | 11 | 8.94E-07 |

|     |    |                                                                                                      |    |          |
|-----|----|------------------------------------------------------------------------------------------------------|----|----------|
| 86  | BP | GO:1902895~positive regulation of pri-miRNA transcription from RNA polymerase II promoter            | 8  | 9.20E-07 |
| 87  | BP | GO:0043154~negative regulation of cysteine-type endopeptidase activity involved in apoptotic process | 9  | 9.21E-07 |
| 88  | BP | GO:0038003~opioid receptor signaling pathway                                                         | 5  | 9.84E-07 |
| 89  | BP | GO:0043278~response to morphine                                                                      | 7  | 9.98E-07 |
| 90  | BP | GO:0007623~circadian rhythm                                                                          | 9  | 1.03E-06 |
| 91  | BP | GO:0045944~positive regulation of transcription from RNA polymerase II promoter                      | 34 | 1.18E-06 |
| 92  | BP | GO:0033674~positive regulation of kinase activity                                                    | 9  | 1.43E-06 |
| 93  | BP | GO:0071300~cellular response to retinoic acid                                                        | 9  | 1.58E-06 |
| 94  | BP | GO:0016310~phosphorylation                                                                           | 11 | 1.74E-06 |
| 95  | BP | GO:0032091~negative regulation of protein binding                                                    | 9  | 1.76E-06 |
| 96  | BP | GO:0048167~regulation of synaptic plasticity                                                         | 8  | 2.09E-06 |
| 97  | BP | GO:0007193~adenylate cyclase-inhibiting G-protein coupled receptor signaling pathway                 | 8  | 2.37E-06 |
| 98  | BP | GO:1904707~positive regulation of vascular smooth muscle cell proliferation                          | 8  | 2.37E-06 |
| 99  | BP | GO:0071407~cellular response to organic cyclic compound                                              | 8  | 2.37E-06 |
| 100 | BP | GO:0016241~regulation of macroautophagy                                                              | 8  | 2.37E-06 |
| 101 | BP | GO:0008285~negative regulation of cell proliferation                                                 | 19 | 3.76E-06 |
| 102 | BP | GO:0071230~cellular response to amino acid stimulus                                                  | 8  | 3.85E-06 |
| 103 | BP | GO:0007399~nervous system development                                                                | 18 | 3.85E-06 |
| 104 | BP | GO:0031663~lipopolysaccharide-mediated signaling pathway                                             | 7  | 4.11E-06 |
| 105 | BP | GO:0038095~Fc-epsilon receptor signaling pathway                                                     | 6  | 4.52E-06 |
| 106 | BP | GO:0042593~glucose homeostasis                                                                       | 10 | 4.97E-06 |
| 107 | BP | GO:0042311~vasodilation                                                                              | 7  | 5.56E-06 |
| 108 | BP | GO:0007275~multicellular organism development                                                        | 13 | 5.65E-06 |
| 109 | BP | GO:0051090~regulation of sequence-specific DNA binding transcription factor activity                 | 6  | 5.66E-06 |
| 110 | BP | GO:1900273~positive regulation of long-term synaptic potentiation                                    | 6  | 5.66E-06 |

|     |    |                                                                            |    |          |
|-----|----|----------------------------------------------------------------------------|----|----------|
| 111 | BP | GO:0007507~heart development                                               | 13 | 5.90E-06 |
| 112 | BP | GO:1990090~cellular response to nerve growth factor stimulus               | 7  | 6.42E-06 |
| 113 | BP | GO:0002931~response to ischemia                                            | 8  | 6.68E-06 |
| 114 | BP | GO:0006816~calcium ion transport                                           | 9  | 7.00E-06 |
| 115 | BP | GO:0051000~positive regulation of nitric-oxide synthase activity           | 6  | 8.60E-06 |
| 116 | BP | GO:0060134~prepulse inhibition                                             | 5  | 9.62E-06 |
| 117 | BP | GO:0043123~positive regulation of I-kappaB kinase/NF-kappaB signaling      | 12 | 9.94E-06 |
| 118 | BP | GO:0098664~G-protein coupled serotonin receptor signaling pathway          | 6  | 1.26E-05 |
| 119 | BP | GO:0031622~positive regulation of fever generation                         | 4  | 1.31E-05 |
| 120 | BP | GO:0014063~negative regulation of serotonin secretion                      | 4  | 1.31E-05 |
| 121 | BP | GO:0014042~positive regulation of neuron maturation                        | 4  | 1.31E-05 |
| 122 | BP | GO:0050728~negative regulation of inflammatory response                    | 10 | 1.36E-05 |
| 123 | BP | GO:0043627~response to estrogen                                            | 8  | 1.47E-05 |
| 124 | BP | GO:0070301~cellular response to hydrogen peroxide                          | 8  | 1.76E-05 |
| 125 | BP | GO:0050900~leukocyte migration                                             | 6  | 1.80E-05 |
| 126 | BP | GO:0048266~behavioral response to pain                                     | 5  | 1.81E-05 |
| 127 | BP | GO:0048148~behavioral response to cocaine                                  | 5  | 1.81E-05 |
| 128 | BP | GO:1904645~response to beta-amyloid                                        | 5  | 1.81E-05 |
| 129 | BP | GO:0008630~intrinsic apoptotic signaling pathway in response to DNA damage | 7  | 1.81E-05 |
| 130 | BP | GO:0009314~response to radiation                                           | 6  | 2.12E-05 |
| 131 | BP | GO:0097191~extrinsic apoptotic signaling pathway                           | 7  | 2.27E-05 |
| 132 | BP | GO:0050727~regulation of inflammatory response                             | 9  | 2.34E-05 |
| 133 | BP | GO:0019395~fatty acid oxidation                                            | 5  | 2.39E-05 |
| 134 | BP | GO:0046677~response to antibiotic                                          | 6  | 2.49E-05 |
| 135 | BP | GO:0045931~positive regulation of mitotic cell cycle                       | 6  | 2.49E-05 |
| 136 | BP | GO:0034605~cellular response to heat                                       | 7  | 2.54E-05 |
| 137 | BP | GO:0042542~response to hydrogen peroxide                                   | 7  | 2.54E-05 |
| 138 | BP | GO:0032229~negative regulation of synaptic transmission, GABAergic         | 4  | 2.60E-05 |
| 139 | BP | GO:0051403~stress-activated MAPK cascade                                   | 5  | 3.09E-05 |

|     |    |                                                                                                                                                  |    |          |
|-----|----|--------------------------------------------------------------------------------------------------------------------------------------------------|----|----------|
| 140 | BP | GO:0007188~adenylate cyclase-modulating G-protein coupled receptor signaling pathway                                                             | 7  | 3.15E-05 |
| 141 | BP | GO:0016485~protein processing                                                                                                                    | 8  | 3.19E-05 |
| 142 | BP | GO:0007218~neuropeptide signaling pathway                                                                                                        | 9  | 3.27E-05 |
| 143 | BP | GO:0051482~positive regulation of cytosolic calcium ion concentration involved in phospholipase C-activating G-protein coupled signaling pathway | 6  | 3.39E-05 |
| 144 | BP | GO:0035924~cellular response to vascular endothelial growth factor stimulus                                                                      | 6  | 3.39E-05 |
| 145 | BP | GO:0051930~regulation of sensory perception of pain                                                                                              | 6  | 3.39E-05 |
| 146 | BP | GO:0050808~synapse organization                                                                                                                  | 7  | 3.87E-05 |
| 147 | BP | GO:0034612~response to tumor necrosis factor                                                                                                     | 6  | 3.91E-05 |
| 148 | BP | GO:0051896~regulation of protein kinase B signaling                                                                                              | 5  | 3.94E-05 |
| 149 | BP | GO:0045987~positive regulation of smooth muscle contraction                                                                                      | 5  | 3.94E-05 |
| 150 | BP | GO:0051770~positive regulation of nitric-oxide synthase biosynthetic process                                                                     | 5  | 3.94E-05 |
| 151 | BP | GO:0032880~regulation of protein localization                                                                                                    | 8  | 4.04E-05 |
| 152 | BP | GO:0048678~response to axon injury                                                                                                               | 6  | 4.51E-05 |
| 153 | BP | GO:0034121~regulation of toll-like receptor signaling pathway                                                                                    | 4  | 4.52E-05 |
| 154 | BP | GO:0007198~adenylate cyclase-inhibiting serotonin receptor signaling pathway                                                                     | 4  | 4.52E-05 |
| 155 | BP | GO:0060440~trachea formation                                                                                                                     | 4  | 4.52E-05 |
| 156 | BP | GO:0002028~regulation of sodium ion transport                                                                                                    | 5  | 4.95E-05 |
| 157 | BP | GO:0007626~locomotory behavior                                                                                                                   | 8  | 5.07E-05 |
| 158 | BP | GO:0007596~blood coagulation                                                                                                                     | 8  | 5.46E-05 |
| 159 | BP | GO:0007249~I-kappaB kinase/NF-kappaB signaling                                                                                                   | 7  | 5.71E-05 |
| 160 | BP | GO:2001240~negative regulation of extrinsic apoptotic signaling pathway in absence of ligand                                                     | 6  | 5.89E-05 |
| 161 | BP | GO:0008625~extrinsic apoptotic signaling pathway via death domain receptors                                                                      | 6  | 6.70E-05 |
| 162 | BP | GO:0030324~lung development                                                                                                                      | 8  | 6.77E-05 |
| 163 | BP | GO:0009612~response to mechanical stimulus                                                                                                       | 7  | 6.86E-05 |
| 164 | BP | GO:0070212~protein poly-ADP-ribosylation                                                                                                         | 4  | 7.17E-05 |
| 165 | BP | GO:0051092~positive regulation of NF-kappaB transcription factor activity                                                                        | 10 | 7.42E-05 |
| 166 | BP | GO:0030168~platelet activation                                                                                                                   | 7  | 7.50E-05 |

|     |    |                                                                                                |    |          |
|-----|----|------------------------------------------------------------------------------------------------|----|----------|
| 167 | BP | GO:1902004~positive regulation of beta-amyloid formation                                       | 5  | 7.51E-05 |
| 168 | BP | GO:0001659~temperature homeostasis                                                             | 5  | 7.51E-05 |
| 169 | BP | GO:0001975~response to amphetamine                                                             | 6  | 7.59E-05 |
| 170 | BP | GO:0032731~positive regulation of interleukin-1 beta production                                | 7  | 8.19E-05 |
| 171 | BP | GO:0031295~T cell costimulation                                                                | 6  | 8.56E-05 |
| 172 | BP | GO:0010976~positive regulation of neuron projection development                                | 9  | 9.02E-05 |
| 173 | BP | GO:0038083~peptidyl-tyrosine autophosphorylation                                               | 5  | 9.11E-05 |
| 174 | BP | GO:0031175~neuron projection development                                                       | 9  | 9.53E-05 |
| 175 | BP | GO:0007196~adenylate cyclase-inhibiting G-protein coupled glutamate receptor signaling pathway | 4  | 1.07E-04 |
| 176 | BP | GO:2000641~regulation of early endosome to late endosome transport                             | 4  | 1.07E-04 |
| 177 | BP | GO:0051209~release of sequestered calcium ion into cytosol                                     | 6  | 1.08E-04 |
| 178 | BP | GO:0035235~ionotropic glutamate receptor signaling pathway                                     | 5  | 1.09E-04 |
| 179 | BP | GO:0006509~membrane protein ectodomain proteolysis                                             | 5  | 1.09E-04 |
| 180 | BP | GO:0060252~positive regulation of glial cell proliferation                                     | 5  | 1.09E-04 |
| 181 | BP | GO:0001525~angiogenesis                                                                        | 12 | 1.20E-04 |
| 182 | BP | GO:0009611~response to wounding                                                                | 7  | 1.24E-04 |
| 183 | BP | GO:0045861~negative regulation of proteolysis                                                  | 5  | 1.30E-04 |
| 184 | BP | GO:0014065~phosphatidylinositol 3-kinase signaling                                             | 6  | 1.35E-04 |
| 185 | BP | GO:0007186~G-protein coupled receptor signaling pathway                                        | 25 | 1.36E-04 |
| 186 | BP | GO:0042391~regulation of membrane potential                                                    | 8  | 1.39E-04 |
| 187 | BP | GO:0001973~adenosine receptor signaling pathway                                                | 4  | 1.51E-04 |
| 188 | BP | GO:0051901~positive regulation of mitochondrial depolarization                                 | 4  | 1.51E-04 |
| 189 | BP | GO:0014074~response to purine-containing compound                                              | 4  | 1.51E-04 |
| 190 | BP | GO:0060397~JAK-STAT cascade involved in growth hormone signaling pathway                       | 4  | 1.51E-04 |
| 191 | BP | GO:0034205~beta-amyloid formation                                                              | 4  | 1.51E-04 |
| 192 | BP | GO:0050796~regulation of insulin secretion                                                     | 6  | 1.66E-04 |



|     |    |                                                                              |    |          |
|-----|----|------------------------------------------------------------------------------|----|----------|
| 193 | BP | GO:0043393~regulation of protein binding                                     | 5  | 1.80E-04 |
| 194 | BP | GO:0051924~regulation of calcium ion<br>transport                            | 5  | 1.80E-04 |
| 195 | BP | GO:0010508~positive regulation of autophagy                                  | 7  | 1.82E-04 |
| 196 | BP | GO:0048538~thymus development                                                | 6  | 1.84E-04 |
| 197 | BP | GO:0032760~positive regulation of tumor<br>necrosis factor production        | 8  | 1.99E-04 |
| 198 | BP | GO:0007173~epidermal growth factor receptor<br>signaling pathway             | 6  | 2.03E-04 |
| 199 | BP | GO:0051967~negative regulation of synaptic<br>transmission, glutamatergic    | 4  | 2.06E-04 |
| 200 | BP | GO:0060020~Bergmann glial cell<br>differentiation                            | 4  | 2.06E-04 |
| 201 | BP | GO:0030518~intracellular steroid hormone<br>receptor signaling pathway       | 4  | 2.06E-04 |
| 202 | BP | GO:1905564~positive regulation of vascular<br>endothelial cell proliferation | 5  | 2.09E-04 |
| 203 | BP | GO:0046697~decidualization                                                   | 5  | 2.09E-04 |
| 204 | BP | GO:0016540~protein autoprocessing                                            | 5  | 2.09E-04 |
| 205 | BP | GO:0032092~positive regulation of protein<br>binding                         | 7  | 2.11E-04 |
| 206 | BP | GO:0032868~response to insulin                                               | 7  | 2.11E-04 |
| 207 | BP | GO:0032869~cellular response to insulin<br>stimulus                          | 8  | 2.11E-04 |
| 208 | BP | GO:0090263~positive regulation of canonical<br>Wnt signaling pathway         | 8  | 2.11E-04 |
| 209 | BP | GO:0031398~positive regulation of protein<br>ubiquitination                  | 7  | 2.26E-04 |
| 210 | BP | GO:0048873~homeostasis of number of cells<br>within a tissue                 | 5  | 2.42E-04 |
| 211 | BP | GO:0002052~positive regulation of neuroblast<br>proliferation                | 5  | 2.42E-04 |
| 212 | BP | GO:2001243~negative regulation of intrinsic<br>apoptotic signaling pathway   | 5  | 2.42E-04 |
| 213 | BP | GO:0050877~neurological system process                                       | 6  | 2.45E-04 |
| 214 | BP | GO:0050890~cognition                                                         | 6  | 2.45E-04 |
| 215 | BP | GO:0001933~negative regulation of protein<br>phosphorylation                 | 7  | 2.60E-04 |
| 216 | BP | GO:0008217~regulation of blood pressure                                      | 7  | 2.60E-04 |
| 217 | BP | GO:0006974~cellular response to DNA<br>damage stimulus                       | 12 | 2.64E-04 |
| 218 | BP | GO:0007600~sensory perception                                                | 4  | 2.73E-04 |
| 219 | BP | GO:0070213~protein auto-ADP-ribosylation                                     | 4  | 2.73E-04 |

|     |    |                                                                                                      |   |          |
|-----|----|------------------------------------------------------------------------------------------------------|---|----------|
| 220 | BP | GO:0042136~neurotransmitter biosynthetic process                                                     | 4 | 2.73E-04 |
| 221 | BP | GO:0043491~protein kinase B signaling                                                                | 6 | 2.94E-04 |
| 222 | BP | GO:0009408~response to heat                                                                          | 6 | 2.94E-04 |
| 223 | BP | GO:0051602~response to electrical stimulus                                                           | 5 | 3.18E-04 |
| 224 | BP | GO:0043280~positive regulation of cysteine-type endopeptidase activity involved in apoptotic process | 6 | 3.22E-04 |
| 225 | BP | GO:0001932~regulation of protein phosphorylation                                                     | 6 | 3.22E-04 |
| 226 | BP | GO:0033209~tumor necrosis factor-mediated signaling pathway                                          | 6 | 3.51E-04 |
| 227 | BP | GO:0031397~negative regulation of protein ubiquitination                                             | 6 | 3.51E-04 |
| 228 | BP | GO:0048011~neurotrophin TRK receptor signaling pathway                                               | 4 | 3.52E-04 |
| 229 | BP | GO:0050435~beta-amyloid metabolic process                                                            | 4 | 3.52E-04 |
| 230 | BP | GO:0010739~positive regulation of protein kinase A signaling                                         | 4 | 3.52E-04 |
| 231 | BP | GO:0051091~positive regulation of sequence-specific DNA binding transcription factor activity        | 8 | 3.61E-04 |
| 232 | BP | GO:2000463~positive regulation of excitatory postsynaptic potential                                  | 5 | 3.62E-04 |
| 233 | BP | GO:2001235~positive regulation of apoptotic signaling pathway                                        | 5 | 3.62E-04 |
| 234 | BP | GO:0043200~response to amino acid                                                                    | 5 | 3.62E-04 |
| 235 | BP | GO:0042327~positive regulation of phosphorylation                                                    | 5 | 3.62E-04 |
| 236 | BP | GO:0001662~behavioral fear response                                                                  | 5 | 3.62E-04 |
| 237 | BP | GO:0030592~DNA ADP-ribosylation                                                                      | 3 | 3.63E-04 |
| 238 | BP | GO:0099553~trans-synaptic signaling by endocannabinoid, modulating synaptic transmission             | 3 | 3.63E-04 |
| 239 | BP | GO:0031281~positive regulation of cyclase activity                                                   | 3 | 3.63E-04 |
| 240 | BP | GO:0021697~cerebellar cortex formation                                                               | 3 | 3.63E-04 |
| 241 | BP | GO:0071887~leukocyte apoptotic process                                                               | 3 | 3.63E-04 |
| 242 | BP | GO:0006979~response to oxidative stress                                                              | 8 | 3.80E-04 |
| 243 | BP | GO:0043552~positive regulation of phosphatidylinositol 3-kinase activity                             | 5 | 4.10E-04 |
| 244 | BP | GO:0042987~amyloid precursor protein catabolic process                                               | 4 | 4.44E-04 |
| 245 | BP | GO:0000186~activation of MAPKK activity                                                              | 4 | 4.44E-04 |

|     |    |                                                                                        |    |          |
|-----|----|----------------------------------------------------------------------------------------|----|----------|
| 246 | BP | GO:0008543~fibroblast growth factor receptor<br>signaling pathway                      | 6  | 4.50E-04 |
| 247 | BP | GO:0007409~axonogenesis                                                                | 7  | 4.62E-04 |
| 248 | BP | GO:0040018~positive regulation of<br>multicellular organism growth                     | 5  | 4.63E-04 |
| 249 | BP | GO:0043687~post-translational protein<br>modification                                  | 5  | 4.63E-04 |
| 250 | BP | GO:0060045~positive regulation of cardiac<br>muscle cell proliferation                 | 5  | 4.63E-04 |
| 251 | BP | GO:0007190~activation of adenylate cyclase<br>activity                                 | 5  | 4.63E-04 |
| 252 | BP | GO:1900182~positive regulation of protein<br>localization to nucleus                   | 5  | 4.63E-04 |
| 253 | BP | GO:0034644~cellular response to UV                                                     | 6  | 4.87E-04 |
| 254 | BP | GO:0032212~positive regulation of telomere<br>maintenance via telomerase               | 5  | 5.20E-04 |
| 255 | BP | GO:0051973~positive regulation of telomerase<br>activity                               | 5  | 5.20E-04 |
| 256 | BP | GO:0016242~negative regulation of<br>macroautophagy                                    | 4  | 5.50E-04 |
| 257 | BP | GO:0003376~sphingosine-1-phosphate<br>signaling pathway                                | 4  | 5.50E-04 |
| 258 | BP | GO:1900034~regulation of cellular response to<br>heat                                  | 4  | 5.50E-04 |
| 259 | BP | GO:1903827~regulation of cellular protein<br>localization                              | 4  | 5.50E-04 |
| 260 | BP | GO:0030307~positive regulation of cell growth                                          | 7  | 5.52E-04 |
| 261 | BP | GO:0019369~arachidonic acid metabolic<br>process                                       | 5  | 5.82E-04 |
| 262 | BP | GO:0090050~positive regulation of cell<br>migration involved in sprouting angiogenesis | 5  | 5.82E-04 |
| 263 | BP | GO:0007612~learning                                                                    | 6  | 6.13E-04 |
| 264 | BP | GO:0007166~cell surface receptor signaling<br>pathway                                  | 12 | 6.13E-04 |
| 265 | BP | GO:0050731~positive regulation of peptidyl-<br>tyrosine phosphorylation                | 7  | 6.55E-04 |
| 266 | BP | GO:0051146~striated muscle cell<br>differentiation                                     | 4  | 6.72E-04 |
| 267 | BP | GO:1903351~cellular response to dopamine                                               | 4  | 6.72E-04 |
| 268 | BP | GO:1904019~epithelial cell apoptotic process                                           | 4  | 6.72E-04 |
| 269 | BP | GO:0007216~G-protein coupled glutamate<br>receptor signaling pathway                   | 4  | 6.72E-04 |
| 270 | BP | GO:1990044~protein localization to lipid<br>particle                                   | 3  | 7.20E-04 |

|     |    |                                                                                  |    |             |
|-----|----|----------------------------------------------------------------------------------|----|-------------|
| 271 | BP | GO:0035585~calcium-mediated signaling<br>using extracellular calcium source      | 3  | 7.20E-04    |
| 272 | BP | GO:0014827~intestine smooth muscle<br>contraction                                | 3  | 7.20E-04    |
| 273 | BP | GO:1990911~response to psychosocial stress                                       | 3  | 7.20E-04    |
| 274 | BP | GO:0090170~regulation of Golgi inheritance                                       | 3  | 7.20E-04    |
| 275 | BP | GO:0071549~cellular response to<br>dexamethasone stimulus                        | 5  | 7.22E-04    |
| 276 | BP | GO:0010975~regulation of neuron projection<br>development                        | 5  | 7.22E-04    |
| 277 | BP | GO:0046627~negative regulation of insulin<br>receptor signaling pathway          | 5  | 8.00E-04    |
| 278 | BP | GO:1904355~positive regulation of telomere<br>capping                            | 4  | 8.09E-04    |
| 279 | BP | GO:0071380~cellular response to<br>prostaglandin E stimulus                      | 4  | 8.09E-04    |
| 280 | BP | GO:2000310~regulation of NMDA receptor<br>activity                               | 4  | 8.09E-04    |
| 281 | BP | GO:0051726~regulation of cell cycle                                              | 12 | 8.15E-04    |
| 282 | BP | GO:0060291~long-term synaptic potentiation                                       | 6  | 8.75E-04    |
| 283 | BP | GO:0035690~cellular response to drug                                             | 6  | 8.75E-04    |
| 284 | BP | GO:0001890~placenta development                                                  | 5  | 8.84E-04    |
| 285 | BP | GO:0046326~positive regulation of glucose<br>import                              | 5  | 8.84E-04    |
| 286 | BP | GO:0010595~positive regulation of endothelial<br>cell migration                  | 6  | 9.36E-04    |
| 287 | BP | GO:0071880~adenylate cyclase-activating<br>adrenergic receptor signaling pathway | 4  | 9.63E-04    |
| 288 | BP | GO:0042531~positive regulation of tyrosine<br>phosphorylation of STAT protein    | 6  | 1.00E-03    |
| 289 | BP | GO:0042060~wound healing                                                         | 7  | 0.001001379 |
| 290 | BP | GO:0032755~positive regulation of<br>interleukin-6 production                    | 7  | 0.001001379 |
| 291 | BP | GO:1901224~positive regulation of NIK/NF-<br>kappaB signaling                    | 6  | 0.00106706  |
| 292 | BP | GO:0030316~osteoclast differentiation                                            | 5  | 0.001069652 |
| 293 | BP | GO:2000811~negative regulation of anoikis                                        | 4  | 0.001134577 |
| 294 | BP | GO:0021954~central nervous system neuron<br>development                          | 4  | 0.001134577 |
| 295 | BP | GO:2000573~positive regulation of DNA<br>biosynthetic process                    | 4  | 0.001134577 |
| 296 | BP | GO:0097202~activation of cysteine-type<br>endopeptidase activity                 | 4  | 0.001134577 |
| 297 | BP | GO:0010039~response to iron ion                                                  | 4  | 0.001134577 |

|     |    |                                                                                                 |    |             |
|-----|----|-------------------------------------------------------------------------------------------------|----|-------------|
| 298 | BP | GO:0009409~response to cold                                                                     | 5  | 0.001172107 |
| 299 | BP | GO:0071392~cellular response to estradiol stimulus                                              | 5  | 0.001172107 |
| 300 | BP | GO:0032310~prostaglandin secretion                                                              | 3  | 0.001191409 |
| 301 | BP | GO:0014050~negative regulation of glutamate secretion                                           | 3  | 0.001191409 |
| 302 | BP | GO:0045759~negative regulation of action potential                                              | 3  | 0.001191409 |
| 303 | BP | GO:0072709~cellular response to sorbitol                                                        | 3  | 0.001191409 |
| 304 | BP | GO:1904000~positive regulation of eating behavior                                               | 3  | 0.001191409 |
| 305 | BP | GO:0072734~cellular response to staurosporine                                                   | 3  | 0.001191409 |
| 306 | BP | GO:0070424~regulation of nucleotide-binding oligomerization domain containing signaling pathway | 3  | 0.001191409 |
| 307 | BP | GO:0045923~positive regulation of fatty acid metabolic process                                  | 3  | 0.001191409 |
| 308 | BP | GO:0014061~regulation of norepinephrine secretion                                               | 3  | 0.001191409 |
| 309 | BP | GO:0046889~positive regulation of lipid biosynthetic process                                    | 4  | 0.001323967 |
| 310 | BP | GO:0050729~positive regulation of inflammatory response                                         | 7  | 0.001407426 |
| 311 | BP | GO:0006874~cellular calcium ion homeostasis                                                     | 7  | 0.001407426 |
| 312 | BP | GO:0006366~transcription from RNA polymerase II promoter                                        | 10 | 0.001452617 |
| 313 | BP | GO:0009725~response to hormone                                                                  | 5  | 0.001520469 |
| 314 | BP | GO:0032722~positive regulation of chemokine production                                          | 5  | 0.001520469 |
| 315 | BP | GO:0043407~negative regulation of MAP kinase activity                                           | 5  | 0.001520469 |
| 316 | BP | GO:0009411~response to UV                                                                       | 5  | 0.001520469 |
| 317 | BP | GO:0030154~cell differentiation                                                                 | 18 | 0.00152352  |
| 318 | BP | GO:1902894~negative regulation of pri-miRNA transcription from RNA polymerase II promoter       | 4  | 0.001532104 |
| 319 | BP | GO:0010288~response to lead ion                                                                 | 4  | 0.001532104 |
| 320 | BP | GO:0045088~regulation of innate immune response                                                 | 4  | 0.001532104 |
| 321 | BP | GO:0031669~cellular response to nutrient levels                                                 | 4  | 0.001532104 |
| 322 | BP | GO:0032930~positive regulation of superoxide anion generation                                   | 4  | 0.001532104 |

|     |    |                                                                                             |   |             |
|-----|----|---------------------------------------------------------------------------------------------|---|-------------|
| 323 | BP | GO:0038096~Fc-gamma receptor signaling pathway involved in phagocytosis                     | 4 | 0.001532104 |
| 324 | BP | GO:0007584~response to nutrient                                                             | 6 | 0.001544119 |
| 325 | BP | GO:0001938~positive regulation of endothelial cell proliferation                            | 6 | 0.001636728 |
| 326 | BP | GO:0001837~epithelial to mesenchymal transition                                             | 5 | 0.001651013 |
| 327 | BP | GO:0006809~nitric oxide biosynthetic process                                                | 4 | 0.001759638 |
| 328 | BP | GO:0019222~regulation of metabolic process                                                  | 4 | 0.001759638 |
| 329 | BP | GO:0002223~stimulatory C-type lectin receptor signaling pathway                             | 4 | 0.001759638 |
| 330 | BP | GO:0019221~cytokine-mediated signaling pathway                                              | 8 | 0.001769671 |
| 331 | BP | GO:1904428~negative regulation of tubulin deacetylation                                     | 3 | 0.001774091 |
| 332 | BP | GO:0032025~response to cobalt ion                                                           | 3 | 0.001774091 |
| 333 | BP | GO:0034440~lipid oxidation                                                                  | 3 | 0.001774091 |
| 334 | BP | GO:1904062~regulation of cation transmembrane transport                                     | 3 | 0.001774091 |
| 335 | BP | GO:0007595~lactation                                                                        | 5 | 0.001789145 |
| 336 | BP | GO:0032436~positive regulation of proteasomal ubiquitin-dependent protein catabolic process | 6 | 0.002048351 |
| 337 | BP | GO:0045737~positive regulation of cyclin-dependent protein serine/threonine kinase activity | 5 | 0.002089071 |
| 338 | BP | GO:0007005~mitochondrion organization                                                       | 6 | 0.002162072 |
| 339 | BP | GO:0051247~positive regulation of protein metabolic process                                 | 4 | 0.002275363 |
| 340 | BP | GO:0006471~protein ADP-ribosylation                                                         | 4 | 0.002275363 |
| 341 | BP | GO:0038061~NIK/NF-kappaB signaling                                                          | 4 | 0.002275363 |
| 342 | BP | GO:0006527~arginine catabolic process                                                       | 3 | 0.002465646 |
| 343 | BP | GO:1903829~positive regulation of cellular protein localization                             | 3 | 0.002465646 |
| 344 | BP | GO:0007210~serotonin receptor signaling pathway                                             | 3 | 0.002465646 |
| 345 | BP | GO:0036016~cellular response to interleukin-3                                               | 3 | 0.002465646 |
| 346 | BP | GO:0014047~glutamate secretion                                                              | 3 | 0.002465646 |
| 347 | BP | GO:0032094~response to food                                                                 | 4 | 0.002564719 |
| 348 | BP | GO:0071294~cellular response to zinc ion                                                    | 4 | 0.002564719 |
| 349 | BP | GO:0030225~macrophage differentiation                                                       | 4 | 0.002564719 |
| 350 | BP | GO:0060999~positive regulation of dendritic spine development                               | 4 | 0.002564719 |

|     |    |                                                                                                           |   |             |
|-----|----|-----------------------------------------------------------------------------------------------------------|---|-------------|
| 351 | BP | GO:0007271~synaptic transmission,<br>cholinergic                                                          | 4 | 0.002564719 |
| 352 | BP | GO:0048168~regulation of neuronal synaptic<br>plasticity                                                  | 4 | 0.002564719 |
| 353 | BP | GO:0002862~negative regulation of<br>inflammatory response to antigenic stimulus                          | 4 | 0.002875801 |
| 354 | BP | GO:0006936~muscle contraction                                                                             | 6 | 0.002943307 |
| 355 | BP | GO:0010507~negative regulation of autophagy                                                               | 5 | 0.00298721  |
| 356 | BP | GO:0045600~positive regulation of fat cell<br>differentiation                                             | 5 | 0.00298721  |
| 357 | BP | GO:0034599~cellular response to oxidative<br>stress                                                       | 6 | 0.003243923 |
| 358 | BP | GO:0030182~neuron differentiation                                                                         | 8 | 0.003263579 |
| 359 | BP | GO:0048643~positive regulation of skeletal<br>muscle tissue development                                   | 3 | 0.003263616 |
| 360 | BP | GO:0071420~cellular response to histamine                                                                 | 3 | 0.003263616 |
| 361 | BP | GO:0033129~positive regulation of histone<br>phosphorylation                                              | 3 | 0.003263616 |
| 362 | BP | GO:0051346~negative regulation of hydrolase<br>activity                                                   | 3 | 0.003263616 |
| 363 | BP | GO:0010518~positive regulation of<br>phospholipase activity                                               | 3 | 0.003263616 |
| 364 | BP | GO:0002686~negative regulation of leukocyte<br>migration                                                  | 3 | 0.003263616 |
| 365 | BP | GO:0035095~behavioral response to nicotine                                                                | 3 | 0.003263616 |
| 366 | BP | GO:0007197~adenylate cyclase-inhibiting G-<br>protein coupled acetylcholine receptor<br>signaling pathway | 3 | 0.003263616 |
| 367 | BP | GO:0014823~response to activity                                                                           | 5 | 0.003410339 |
| 368 | BP | GO:1902042~negative regulation of extrinsic<br>apoptotic signaling pathway via death<br>domain receptors  | 4 | 0.003565188 |
| 369 | BP | GO:0035066~positive regulation of histone<br>acetylation                                                  | 4 | 0.003565188 |
| 370 | BP | GO:0070050~neuron cellular homeostasis                                                                    | 4 | 0.003565188 |
| 371 | BP | GO:0048146~positive regulation of fibroblast<br>proliferation                                             | 5 | 0.003636436 |
| 372 | BP | GO:0031647~regulation of protein stability                                                                | 6 | 0.003735435 |
| 373 | BP | GO:0071363~cellular response to growth<br>factor stimulus                                                 | 5 | 0.003872495 |
| 374 | BP | GO:0071280~cellular response to copper ion                                                                | 4 | 0.003944449 |
| 375 | BP | GO:0051928~positive regulation of calcium ion<br>transport                                                | 4 | 0.003944449 |
| 376 | BP | GO:0007257~activation of JUN kinase activity                                                              | 4 | 0.003944449 |

|     |    |                                                                                     |   |             |
|-----|----|-------------------------------------------------------------------------------------|---|-------------|
| 377 | BP | GO:0007205~protein kinase C-activating G-protein coupled receptor signaling pathway | 4 | 0.003944449 |
| 378 | BP | GO:0042420~dopamine catabolic process                                               | 3 | 0.004165584 |
| 379 | BP | GO:0007220~Notch receptor processing                                                | 3 | 0.004165584 |
| 380 | BP | GO:0034405~response to fluid shear stress                                           | 3 | 0.004165584 |
| 381 | BP | GO:0071316~cellular response to nicotine                                            | 3 | 0.004165584 |
| 382 | BP | GO:0071287~cellular response to manganese ion                                       | 3 | 0.004165584 |
| 383 | BP | GO:0097553~calcium ion transmembrane import into cytosol                            | 3 | 0.004165584 |
| 384 | BP | GO:0001774~microglial cell activation                                               | 4 | 0.004347355 |
| 385 | BP | GO:0014059~regulation of dopamine secretion                                         | 4 | 0.004347355 |
| 386 | BP | GO:0048010~vascular endothelial growth factor receptor signaling pathway            | 4 | 0.004347355 |
| 387 | BP | GO:0010800~positive regulation of peptidyl-threonine phosphorylation                | 4 | 0.004347355 |
| 388 | BP | GO:0007631~feeding behavior                                                         | 4 | 0.004347355 |
| 389 | BP | GO:0022900~electron transport chain                                                 | 5 | 0.004375312 |
| 390 | BP | GO:0046330~positive regulation of JNK cascade                                       | 6 | 0.004669846 |
| 391 | BP | GO:0043085~positive regulation of catalytic activity                                | 4 | 0.004774325 |
| 392 | BP | GO:0051881~regulation of mitochondrial membrane potential                           | 4 | 0.004774325 |
| 393 | BP | GO:0044346~fibroblast apoptotic process                                             | 3 | 0.005169175 |
| 394 | BP | GO:0050795~regulation of behavior                                                   | 3 | 0.005169175 |
| 395 | BP | GO:0070244~negative regulation of thymocyte apoptotic process                       | 3 | 0.005169175 |
| 396 | BP | GO:0031000~response to caffeine                                                     | 3 | 0.005169175 |
| 397 | BP | GO:0001963~synaptic transmission, dopaminergic                                      | 3 | 0.005169175 |
| 398 | BP | GO:2001056~positive regulation of cysteine-type endopeptidase activity              | 3 | 0.005169175 |
| 399 | BP | GO:0032872~regulation of stress-activated MAPK cascade                              | 3 | 0.005169175 |
| 400 | BP | GO:0043267~negative regulation of potassium ion transport                           | 3 | 0.005169175 |
| 401 | BP | GO:0042053~regulation of dopamine metabolic process                                 | 3 | 0.005169175 |
| 402 | BP | GO:0090647~modulation of age-related behavioral decline                             | 3 | 0.005169175 |
| 403 | BP | GO:0060259~regulation of feeding behavior                                           | 3 | 0.005169175 |
| 404 | BP | GO:0043068~positive regulation of programmed cell death                             | 3 | 0.005169175 |



|     |    |                                                                                            |   |             |
|-----|----|--------------------------------------------------------------------------------------------|---|-------------|
| 405 | BP | GO:0051272~positive regulation of cellular component movement                              | 3 | 0.005169175 |
| 406 | BP | GO:0010863~positive regulation of phospholipase C activity                                 | 3 | 0.005169175 |
| 407 | BP | GO:0045860~positive regulation of protein kinase activity                                  | 5 | 0.005209249 |
| 408 | BP | GO:0060078~regulation of postsynaptic membrane potential                                   | 4 | 0.005225756 |
| 409 | BP | GO:0043029~T cell homeostasis                                                              | 4 | 0.005225756 |
| 410 | BP | GO:1900745~positive regulation of p38MAPK cascade                                          | 4 | 0.005225756 |
| 411 | BP | GO:0032007~negative regulation of TOR signaling                                            | 4 | 0.005225756 |
| 412 | BP | GO:0046718~viral entry into host cell                                                      | 6 | 0.005304207 |
| 413 | BP | GO:0019228~neuronal action potential                                                       | 4 | 0.005702022 |
| 414 | BP | GO:0048705~skeletal system morphogenesis                                                   | 4 | 0.005702022 |
| 415 | BP | GO:0007628~adult walking behavior                                                          | 4 | 0.005702022 |
| 416 | BP | GO:2001234~negative regulation of apoptotic signaling pathway                              | 4 | 0.005702022 |
| 417 | BP | GO:0032757~positive regulation of interleukin-8 production                                 | 5 | 0.005820589 |
| 418 | BP | GO:0050804~modulation of synaptic transmission                                             | 5 | 0.005820589 |
| 419 | BP | GO:0071466~cellular response to xenobiotic stimulus                                        | 5 | 0.005820589 |
| 420 | BP | GO:0035249~synaptic transmission, glutamatergic                                            | 4 | 0.006203476 |
| 421 | BP | GO:0016055~Wnt signaling pathway                                                           | 8 | 0.006215834 |
| 422 | BP | GO:1900015~regulation of cytokine production involved in inflammatory response             | 3 | 0.00627205  |
| 423 | BP | GO:1903799~negative regulation of production of miRNAs involved in gene silencing by miRNA | 3 | 0.00627205  |
| 424 | BP | GO:0098976~excitatory chemical synaptic transmission                                       | 3 | 0.00627205  |
| 425 | BP | GO:0071492~cellular response to UV-A                                                       | 3 | 0.00627205  |
| 426 | BP | GO:0071803~positive regulation of podosome assembly                                        | 3 | 0.00627205  |
| 427 | BP | GO:0099527~postsynapse to nucleus signaling pathway                                        | 3 | 0.00627205  |
| 428 | BP | GO:0097192~extrinsic apoptotic signaling pathway in absence of ligand                      | 4 | 0.00673045  |

|     |    |                                                                                           |     |             |
|-----|----|-------------------------------------------------------------------------------------------|-----|-------------|
| 429 | BP | GO:2000379~positive regulation of reactive oxygen species metabolic process               | 4   | 0.00673045  |
| 430 | BP | GO:0051384~response to glucocorticoid                                                     | 5   | 0.006824365 |
| 431 | BP | GO:0070507~regulation of microtubule cytoskeleton organization                            | 4   | 0.007283255 |
| 432 | BP | GO:0007405~neuroblast proliferation                                                       | 4   | 0.007283255 |
| 433 | BP | GO:0061051~positive regulation of cell growth involved in cardiac muscle cell development | 3   | 0.007471912 |
| 434 | BP | GO:2000273~positive regulation of receptor activity                                       | 3   | 0.007471912 |
| 435 | BP | GO:1990314~cellular response to insulin-like growth factor stimulus                       | 3   | 0.007471912 |
| 436 | BP | GO:0031284~positive regulation of guanylate cyclase activity                              | 3   | 0.007471912 |
| 437 | BP | GO:0042711~maternal behavior                                                              | 3   | 0.007471912 |
| 438 | BP | GO:0005979~regulation of glycogen biosynthetic process                                    | 3   | 0.007471912 |
| 439 | BP | GO:0007416~synapse assembly                                                               | 5   | 0.007553457 |
| 440 | BP | GO:0046427~positive regulation of JAK-STAT cascade                                        | 4   | 0.007862184 |
| 441 | BP | GO:0048709~oligodendrocyte differentiation                                                | 4   | 0.007862184 |
| 442 | BP | GO:0009791~post-embryonic development                                                     | 5   | 0.007936486 |
| 443 | BP | GO:0007616~long-term memory                                                               | 4   | 0.008467506 |
| 444 | BP | GO:0008219~cell death                                                                     | 4   | 0.008467506 |
| 445 | BP | GO:0048546~digestive tract morphogenesis                                                  | 3   | 0.008766501 |
| 446 | BP | GO:0045670~regulation of osteoclast differentiation                                       | 3   | 0.008766501 |
| 447 | BP | GO:0060396~growth hormone receptor signaling pathway                                      | 3   | 0.008766501 |
| 448 | BP | GO:0046902~regulation of mitochondrial membrane permeability                              | 3   | 0.008766501 |
| 449 | BP | GO:0051918~negative regulation of fibrinolysis                                            | 3   | 0.008766501 |
| 450 | BP | GO:0033628~regulation of cell adhesion mediated by integrin                               | 3   | 0.008766501 |
| 451 | BP | GO:0033077~T cell differentiation in thymus                                               | 4   | 0.009099476 |
| 452 | BP | GO:0070588~calcium ion transmembrane transport                                            | 6   | 0.00974396  |
| 453 | BP | GO:0070555~response to interleukin-1                                                      | 4   | 0.009758327 |
| 454 | BP | GO:0042127~regulation of cell proliferation                                               | 7   | 0.009856978 |
| 1   | CC | GO:0005886~plasma membrane                                                                | 130 | 7.01E-29    |
| 2   | CC | GO:0005887~integral component of plasma membrane                                          | 69  | 2.71E-26    |
| 3   | CC | GO:0030425~dendrite                                                                       | 40  | 2.06E-24    |

|    |    |                                                           |     |          |
|----|----|-----------------------------------------------------------|-----|----------|
| 4  | CC | GO:0045121~membrane raft                                  | 30  | 4.76E-22 |
| 5  | CC | GO:0043025~neuronal cell body                             | 33  | 3.78E-19 |
| 6  | CC | GO:0043005~neuron projection                              | 32  | 4.55E-19 |
| 7  | CC | GO:0045202~synapse                                        | 35  | 1.15E-18 |
| 8  | CC | GO:0098978~glutamatergic synapse                          | 31  | 2.83E-18 |
| 9  | CC | GO:0099056~integral component of<br>presynaptic membrane  | 17  | 5.61E-18 |
| 10 | CC | GO:0030424~axon                                           | 29  | 1.04E-16 |
| 11 | CC | GO:0005737~cytoplasm                                      | 113 | 3.16E-15 |
| 12 | CC | GO:0099055~integral component of<br>postsynaptic membrane | 14  | 3.90E-15 |
| 13 | CC | GO:0070161~anchoring junction                             | 28  | 1.08E-12 |
| 14 | CC | GO:0005829~cytosol                                        | 106 | 1.56E-12 |
| 15 | CC | GO:0014069~postsynaptic density                           | 20  | 5.34E-11 |
| 16 | CC | GO:0005739~mitochondrion                                  | 45  | 7.08E-11 |
| 17 | CC | GO:0009986~cell surface                                   | 28  | 6.50E-10 |
| 18 | CC | GO:0043204~perikaryon                                     | 15  | 3.28E-09 |
| 19 | CC | GO:0005901~caveola                                        | 11  | 7.19E-09 |
| 20 | CC | GO:0031594~neuromuscular junction                         | 11  | 8.18E-09 |
| 21 | CC | GO:0043197~dendritic spine                                | 14  | 2.38E-08 |
| 22 | CC | GO:0048471~perinuclear region of cytoplasm                | 28  | 2.90E-08 |
| 23 | CC | GO:0098793~presynapse                                     | 13  | 3.39E-08 |
| 24 | CC | GO:0098794~postsynapse                                    | 12  | 3.95E-08 |
| 25 | CC | GO:0016020~membrane                                       | 56  | 7.44E-08 |
| 26 | CC | GO:0005634~nucleus                                        | 99  | 8.93E-08 |
| 27 | CC | GO:0032991~macromolecular complex                         | 26  | 9.00E-08 |
| 28 | CC | GO:0005654~nucleoplasm                                    | 74  | 1.46E-07 |
| 29 | CC | GO:0098685~Schaffer collateral - CA1 synapse              | 10  | 3.07E-07 |
| 30 | CC | GO:0043235~receptor complex                               | 14  | 4.75E-07 |
| 31 | CC | GO:0045211~postsynaptic membrane                          | 12  | 8.44E-07 |
| 32 | CC | GO:0032839~dendrite cytoplasm                             | 7   | 1.49E-06 |
| 33 | CC | GO:0030426~growth cone                                    | 10  | 2.67E-05 |
| 34 | CC | GO:0005741~mitochondrial outer membrane                   | 11  | 3.28E-05 |
| 35 | CC | GO:1904813~ficolin-1-rich granule lumen                   | 9   | 4.72E-05 |
| 36 | CC | GO:0044305~calyx of Held                                  | 5   | 5.93E-05 |
| 37 | CC | GO:0098839~postsynaptic density membrane                  | 6   | 7.23E-05 |
| 38 | CC | GO:0043198~dendritic shaft                                | 6   | 9.08E-05 |
| 39 | CC | GO:0005769~early endosome                                 | 13  | 9.82E-05 |
| 40 | CC | GO:0044294~dendritic growth cone                          | 4   | 1.26E-04 |
| 41 | CC | GO:0005641~nuclear envelope lumen                         | 4   | 1.26E-04 |
| 42 | CC | GO:0005925~focal adhesion                                 | 15  | 1.52E-04 |
| 43 | CC | GO:0031588~nucleotide-activated protein<br>kinase complex | 4   | 1.72E-04 |
| 44 | CC | GO:0016021~integral component of membrane                 | 81  | 2.20E-04 |

|    |    |                                                                          |    |          |
|----|----|--------------------------------------------------------------------------|----|----------|
| 45 | CC | GO:0097060~synaptic membrane                                             | 5  | 4.14E-04 |
| 46 | CC | GO:0098666~G-protein coupled serotonin<br>receptor complex               | 3  | 6.38E-04 |
| 47 | CC | GO:0043679~axon terminus                                                 | 6  | 6.65E-04 |
| 48 | CC | GO:0000307~cyclin-dependent protein kinase<br>holoenzyme complex         | 5  | 7.76E-04 |
| 49 | CC | GO:0005783~endoplasmic reticulum                                         | 25 | 8.43E-04 |
| 50 | CC | GO:0005770~late endosome                                                 | 8  | 9.27E-04 |
| 51 | CC | GO:0005635~nuclear envelope                                              | 9  | 9.92E-04 |
| 52 | CC | GO:0005789~endoplasmic reticulum<br>membrane                             | 23 | 0.001481 |
| 53 | CC | GO:0016607~nuclear speck                                                 | 13 | 0.001955 |
| 54 | CC | GO:0043195~terminal bouton                                               | 5  | 0.002741 |
| 55 | CC | GO:0005667~transcription factor complex                                  | 9  | 0.002968 |
| 56 | CC | GO:0008021~synaptic vesicle                                              | 7  | 0.003142 |
| 57 | CC | GO:0005943~phosphatidylinositol 3-kinase<br>complex, class IA            | 3  | 0.003697 |
| 58 | CC | GO:0017146~NMDA selective glutamate<br>receptor complex                  | 3  | 0.003697 |
| 59 | CC | GO:0042734~presynaptic membrane                                          | 5  | 0.003741 |
| 60 | CC | GO:0005911~cell-cell junction                                            | 8  | 0.004042 |
| 61 | CC | GO:0000791~euchromatin                                                   | 5  | 0.004202 |
| 62 | CC | GO:0005788~endoplasmic reticulum lumen                                   | 10 | 0.004918 |
| 63 | CC | GO:0005764~lysosome                                                      | 10 | 0.005232 |
| 64 | CC | GO:0031234~extrinsic component of<br>cytoplasmic side of plasma membrane | 5  | 0.005519 |
| 65 | CC | GO:0099523~presynaptic cytosol                                           | 3  | 0.005571 |
| 66 | CC | GO:0016324~apical plasma membrane                                        | 11 | 0.00595  |
| 67 | CC | GO:0005768~endosome                                                      | 10 | 0.006132 |
| 68 | CC | GO:0030877~beta-catenin destruction complex                              | 3  | 0.006639 |
| 69 | CC | GO:1990909~Wnt signalosome                                               | 3  | 0.007793 |
| 70 | CC | GO:0097449~astrocyte projection                                          | 3  | 0.00903  |
| 1  | MF | GO:0004672~protein kinase activity                                       | 39 | 3.78E-25 |
| 2  | MF | GO:0042802~identical protein binding                                     | 67 | 8.65E-20 |
| 3  | MF | GO:0004674~protein serine/threonine kinase<br>activity                   | 33 | 1.39E-18 |
| 4  | MF | GO:0016301~kinase activity                                               | 26 | 7.95E-18 |
| 5  | MF | GO:0004713~protein tyrosine kinase activity                              | 20 | 2.97E-17 |
| 6  | MF | GO:0004714~transmembrane receptor protein<br>tyrosine kinase activity    | 20 | 4.95E-17 |
| 7  | MF | GO:0019899~enzyme binding                                                | 31 | 9.19E-17 |
| 8  | MF | GO:0005524~ATP binding                                                   | 59 | 9.20E-17 |
| 9  | MF | GO:0030594~neurotransmitter receptor<br>activity                         | 16 | 2.43E-14 |

|    |    |                                                                                                                   |     |          |
|----|----|-------------------------------------------------------------------------------------------------------------------|-----|----------|
| 10 | MF | GO:0005515~protein binding                                                                                        | 188 | 8.53E-13 |
| 11 | MF | GO:0051378~serotonin binding                                                                                      | 8   | 1.63E-11 |
| 12 | MF | GO:0004993~G-protein coupled serotonin<br>receptor activity                                                       | 10  | 1.06E-10 |
| 13 | MF | GO:0019901~protein kinase binding                                                                                 | 27  | 1.54E-10 |
| 14 | MF | GO:0004708~MAP kinase kinase activity                                                                             | 8   | 6.19E-10 |
| 15 | MF | GO:0042803~protein homodimerization<br>activity                                                                   | 30  | 2.42E-09 |
| 16 | MF | GO:0004707~MAP kinase activity                                                                                    | 7   | 1.43E-08 |
| 17 | MF | GO:0004712~protein serine/threonine/tyrosine<br>kinase activity                                                   | 8   | 2.73E-08 |
| 18 | MF | GO:0048156~tau protein binding                                                                                    | 9   | 3.56E-08 |
| 19 | MF | GO:0097110~scaffold protein binding                                                                               | 10  | 8.13E-08 |
| 20 | MF | GO:0005516~calmodulin binding                                                                                     | 15  | 9.37E-08 |
| 21 | MF | GO:0008233~peptidase activity                                                                                     | 11  | 5.34E-07 |
| 22 | MF | GO:0050660~flavin adenine dinucleotide<br>binding                                                                 | 9   | 9.78E-07 |
| 23 | MF | GO:0019903~protein phosphatase binding                                                                            | 10  | 1.09E-06 |
| 24 | MF | GO:0020037~heme binding                                                                                           | 12  | 1.14E-06 |
| 25 | MF | GO:0046875~ephrin receptor binding                                                                                | 7   | 1.14E-06 |
| 26 | MF | GO:0042923~neuropeptide binding                                                                                   | 7   | 1.14E-06 |
| 27 | MF | GO:0097200~cysteine-type endopeptidase<br>activity involved in execution phase of<br>apoptosis                    | 5   | 1.93E-06 |
| 28 | MF | GO:0004879~RNA polymerase II transcription<br>factor activity, ligand-activated sequence-<br>specific DNA binding | 8   | 2.44E-06 |
| 29 | MF | GO:0097153~cysteine-type endopeptidase<br>activity involved in apoptotic process                                  | 5   | 3.18E-06 |
| 30 | MF | GO:0050321~tau-protein kinase activity                                                                            | 6   | 4.00E-06 |
| 31 | MF | GO:0044877~macromolecular complex<br>binding                                                                      | 18  | 5.23E-06 |
| 32 | MF | GO:0001540~beta-amyloid binding                                                                                   | 9   | 5.90E-06 |
| 33 | MF | GO:0004175~endopeptidase activity                                                                                 | 9   | 6.43E-06 |
| 34 | MF | GO:0043560~insulin receptor substrate<br>binding                                                                  | 5   | 7.37E-06 |
| 35 | MF | GO:0001223~transcription coactivator binding                                                                      | 7   | 9.68E-06 |
| 36 | MF | GO:0042277~peptide binding                                                                                        | 8   | 1.17E-05 |
| 37 | MF | GO:0004715~non-membrane spanning protein<br>tyrosine kinase activity                                              | 7   | 1.26E-05 |
| 38 | MF | GO:0001609~G-protein coupled adenosine<br>receptor activity                                                       | 4   | 1.41E-05 |
| 39 | MF | GO:0004985~opioid receptor activity                                                                               | 4   | 2.79E-05 |
| 40 | MF | GO:0002020~protease binding                                                                                       | 9   | 3.38E-05 |

|    |    |                                                                                                                                          |    |          |
|----|----|------------------------------------------------------------------------------------------------------------------------------------------|----|----------|
| 41 | MF | GO:0051721~protein phosphatase 2A binding                                                                                                | 6  | 4.37E-05 |
| 42 | MF | GO:0031625~ubiquitin protein ligase binding                                                                                              | 14 | 4.71E-05 |
| 43 | MF | GO:0004190~aspartic-type endopeptidase activity                                                                                          | 6  | 7.47E-05 |
| 44 | MF | GO:0004679~AMP-activated protein kinase activity                                                                                         | 4  | 7.69E-05 |
| 45 | MF | GO:0004683~calmodulin-dependent protein kinase activity                                                                                  | 5  | 9.96E-05 |
| 46 | MF | GO:0001640~adenylate cyclase inhibiting G-protein coupled glutamate receptor activity                                                    | 4  | 1.14E-04 |
| 47 | MF | GO:0030235~nitric-oxide synthase regulator activity                                                                                      | 4  | 1.14E-04 |
| 48 | MF | GO:0008022~protein C-terminus binding                                                                                                    | 11 | 1.34E-04 |
| 49 | MF | GO:0008134~transcription factor binding                                                                                                  | 11 | 1.40E-04 |
| 50 | MF | GO:0019900~kinase binding                                                                                                                | 8  | 1.61E-04 |
| 51 | MF | GO:0097199~cysteine-type endopeptidase activity involved in apoptotic signaling pathway                                                  | 4  | 1.62E-04 |
| 52 | MF | GO:0070851~growth factor receptor binding                                                                                                | 4  | 1.62E-04 |
| 53 | MF | GO:0005102~receptor binding                                                                                                              | 15 | 1.77E-04 |
| 54 | MF | GO:0005231~excitatory extracellular ligand-gated ion channel activity                                                                    | 6  | 1.85E-04 |
| 55 | MF | GO:0004930~G-protein coupled receptor activity                                                                                           | 22 | 2.05E-04 |
| 56 | MF | GO:0061629~RNA polymerase II sequence-specific DNA binding transcription factor binding                                                  | 10 | 3.00E-04 |
| 57 | MF | GO:0016702~oxidoreductase activity, acting on single donors with incorporation of molecular oxygen, incorporation of two atoms of oxygen | 4  | 3.76E-04 |
| 58 | MF | GO:0004104~cholinesterase activity                                                                                                       | 3  | 3.80E-04 |
| 59 | MF | GO:0004517~nitric-oxide synthase activity                                                                                                | 3  | 3.80E-04 |
| 60 | MF | GO:0004705~JUN kinase activity                                                                                                           | 3  | 3.80E-04 |
| 61 | MF | GO:0015276~ligand-gated ion channel activity                                                                                             | 5  | 4.48E-04 |
| 62 | MF | GO:0004697~protein kinase C activity                                                                                                     | 4  | 4.75E-04 |
| 63 | MF | GO:1904315~transmitter-gated ion channel activity involved in regulation of postsynaptic membrane potential                              | 6  | 5.00E-04 |
| 64 | MF | GO:0004698~calcium-dependent protein kinase C activity                                                                                   | 4  | 7.19E-04 |
| 65 | MF | GO:0008066~glutamate receptor activity                                                                                                   | 4  | 7.19E-04 |
| 66 | MF | GO:0034617~tetrahydrobiopterin binding                                                                                                   | 3  | 7.54E-04 |
| 67 | MF | GO:0043121~neurotrophin binding                                                                                                          | 3  | 7.54E-04 |

|     |    |                                                                   |    |          |
|-----|----|-------------------------------------------------------------------|----|----------|
| 68  | MF | GO:0090722~receptor-receptor interaction                          | 3  | 7.54E-04 |
| 69  | MF | GO:0005030~neurotrophin receptor activity                         | 3  | 7.54E-04 |
| 70  | MF | GO:0004197~cysteine-type endopeptidase activity                   | 7  | 8.25E-04 |
| 71  | MF | GO:1990404~protein ADP-ribosylase activity                        | 4  | 8.66E-04 |
| 72  | MF | GO:0051219~phosphoprotein binding                                 | 5  | 8.72E-04 |
| 73  | MF | GO:0008234~cysteine-type peptidase activity                       | 5  | 8.72E-04 |
| 74  | MF | GO:0008201~heparin binding                                        | 9  | 9.07E-04 |
| 75  | MF | GO:0022848~acetylcholine-gated cation-selective channel activity  | 4  | 0.00103  |
| 76  | MF | GO:0044325~ion channel binding                                    | 8  | 0.00109  |
| 77  | MF | GO:0005007~fibroblast growth factor-activated receptor activity   | 3  | 0.001248 |
| 78  | MF | GO:0022849~glutamate-gated calcium ion channel activity           | 3  | 0.001248 |
| 79  | MF | GO:0050661~NADP binding                                           | 5  | 0.001277 |
| 80  | MF | GO:0031435~mitogen-activated protein kinase kinase kinase binding | 4  | 0.001416 |
| 81  | MF | GO:0005216~ion channel activity                                   | 5  | 0.001522 |
| 82  | MF | GO:0030331~estrogen receptor binding                              | 5  | 0.001656 |
| 83  | MF | GO:0004969~histamine receptor activity                            | 3  | 0.001858 |
| 84  | MF | GO:0008131~primary amine oxidase activity                         | 3  | 0.001858 |
| 85  | MF | GO:0047485~protein N-terminus binding                             | 7  | 0.002074 |
| 86  | MF | GO:0003707~steroid hormone receptor activity                      | 4  | 0.002145 |
| 87  | MF | GO:0043548~phosphatidylinositol 3-kinase binding                  | 4  | 0.002145 |
| 88  | MF | GO:0008270~zinc ion binding                                       | 21 | 0.002238 |
| 89  | MF | GO:0005158~insulin receptor binding                               | 4  | 0.002431 |
| 90  | MF | GO:0004709~MAP kinase kinase kinase activity                      | 4  | 0.002431 |
| 91  | MF | GO:0035240~dopamine binding                                       | 3  | 0.002581 |
| 92  | MF | GO:0004972~NMDA glutamate receptor activity                       | 3  | 0.003416 |
| 93  | MF | GO:0004691~cAMP-dependent protein kinase activity                 | 3  | 0.003416 |
| 94  | MF | GO:0003950~NAD+ ADP-ribosyltransferase activity                   | 4  | 0.003426 |
| 95  | MF | GO:0034618~arginine binding                                       | 3  | 0.00436  |
| 96  | MF | GO:0005496~steroid binding                                        | 4  | 0.004639 |
| 97  | MF | GO:0051428~peptide hormone receptor binding                       | 3  | 0.005409 |
| 98  | MF | GO:0016491~oxidoreductase activity                                | 9  | 0.006293 |
| 99  | MF | GO:0008144~drug binding                                           | 3  | 0.006562 |
| 100 | MF | GO:0042056~chemoattractant activity                               | 4  | 0.007763 |

|     |    |                                       |   |          |
|-----|----|---------------------------------------|---|----------|
| 101 | MF | GO:0042166~acetylcholine binding      | 3 | 0.007816 |
| 102 | MF | GO:0009055~electron carrier activity  | 5 | 0.008184 |
| 103 | MF | GO:0002039~p53 binding                | 5 | 0.008597 |
| 104 | MF | GO:0016594~glycine binding            | 3 | 0.009169 |
| 105 | MF | GO:0004706~JUN kinase kinase activity | 3 | 0.009169 |

---



**Table S5.** The KEGG pathway enrichment analysis of 214 intersective targets based on the P-value<0.01.

| NO. | Category     | Term                                                        | Count | Fold Enrichment | P-value  |
|-----|--------------|-------------------------------------------------------------|-------|-----------------|----------|
| 1   | KEGG_PATHWAY | hsa05200: Pathways in cancer                                | 64    | 4.748892        | 6.76E-27 |
| 2   | KEGG_PATHWAY | hsa04020: Calcium signaling pathway                         | 45    | 7.387681        | 2.21E-26 |
| 3   | KEGG_PATHWAY | hsa04080: Neuroactive ligand-receptor interaction           | 51    | 5.550965        | 3.90E-24 |
| 4   | KEGG_PATHWAY | hsa04024: cAMP signaling pathway                            | 40    | 7.131397        | 9.41E-23 |
| 5   | KEGG_PATHWAY | hsa04210: Apoptosis                                         | 31    | 8.981103        | 1.57E-20 |
| 6   | KEGG_PATHWAY | hsa05161: Hepatitis B                                       | 33    | 8.026123        | 2.67E-20 |
| 7   | KEGG_PATHWAY | hsa05417: Lipid and atherosclerosis                         | 37    | 6.780631        | 3.11E-20 |
| 8   | KEGG_PATHWAY | hsa04726: Serotonergic synapse                              | 28    | 9.593279        | 2.60E-19 |
| 9   | KEGG_PATHWAY | hsa05022: Pathways of neurodegeneration - multiple diseases | 51    | 4.221532        | 8.15E-19 |
| 10  | KEGG_PATHWAY | hsa04725: Cholinergic synapse                               | 26    | 9.065709        | 2.76E-17 |
| 11  | KEGG_PATHWAY | hsa05167: Kaposi sarcoma-associated herpesvirus infection   | 32    | 6.499128        | 6.54E-17 |
| 12  | KEGG_PATHWAY | hsa04728: Dopaminergic synapse                              | 27    | 8.059289        | 1.29E-16 |
| 13  | KEGG_PATHWAY | hsa05010: Alzheimer disease                                 | 43    | 4.412087        | 1.90E-16 |
| 14  | KEGG_PATHWAY | hsa04668: TNF signaling pathway                             | 25    | 8.794859        | 2.70E-16 |
| 15  | KEGG_PATHWAY | hsa05207: Chemical carcinogenesis - receptor activation     | 32    | 5.947316        | 9.71E-16 |
| 16  | KEGG_PATHWAY | hsa04722: Neurotrophin signaling pathway                    | 25    | 8.277514        | 1.28E-15 |
| 17  | KEGG_PATHWAY | hsa04935: Growth hormone synthesis, secretion and action    | 25    | 8.277514        | 1.28E-15 |
| 18  | KEGG_PATHWAY | hsa04750: Inflammatory mediator regulation of TRP channels  | 23    | 9.247166        | 1.89E-15 |
| 19  | KEGG_PATHWAY | hsa01521: EGFR tyrosine kinase inhibitor resistance         | 21    | 10.47367        | 3.19E-15 |
| 20  | KEGG_PATHWAY | hsa05145: Toxoplasmosis                                     | 24    | 8.443064        | 3.46E-15 |
| 21  | KEGG_PATHWAY | hsa04926: Relaxin signaling pathway                         | 25    | 7.635846        | 8.79E-15 |
| 22  | KEGG_PATHWAY | hsa04071: Sphingolipid signaling pathway                    | 24    | 7.946413        | 1.38E-14 |
| 23  | KEGG_PATHWAY | hsa04931: Insulin resistance                                | 23    | 8.390947        | 1.69E-14 |
| 24  | KEGG_PATHWAY | hsa04066: HIF-1 signaling pathway                           | 23    | 8.313965        | 2.06E-14 |
| 25  | KEGG_PATHWAY | hsa05205: Proteoglycans in cancer                           | 30    | 5.765995        | 2.21E-14 |
| 26  | KEGG_PATHWAY | hsa04720: Long-term potentiation                            | 19    | 11.17341        | 2.62E-14 |

|    |              |                                                                |    |          |          |
|----|--------------|----------------------------------------------------------------|----|----------|----------|
| 27 | KEGG_PATHWAY | hsa04933: AGE-RAGE signaling pathway in diabetic complications | 22 | 8.668213 | 3.61E-14 |
| 28 | KEGG_PATHWAY | hsa04010: MAPK signaling pathway                               | 35 | 4.690591 | 4.70E-14 |
| 29 | KEGG_PATHWAY | hsa05418: Fluid shear stress and atherosclerosis               | 25 | 7.086505 | 5.02E-14 |
| 30 | KEGG_PATHWAY | hsa04912: GnRH signaling pathway                               | 21 | 8.896992 | 9.36E-14 |
| 31 | KEGG_PATHWAY | hsa04012: ErbB signaling pathway                               | 20 | 9.270816 | 1.90E-13 |
| 32 | KEGG_PATHWAY | hsa05215: Prostate cancer                                      | 21 | 8.530106 | 2.19E-13 |
| 33 | KEGG_PATHWAY | hsa05163: Human cytomegalovirus infection                      | 30 | 5.253462 | 2.58E-13 |
| 34 | KEGG_PATHWAY | hsa04215: Apoptosis - multiple species                         | 14 | 17.23792 | 2.66E-13 |
| 35 | KEGG_PATHWAY | hsa01522: Endocrine resistance                                 | 21 | 8.443064 | 2.70E-13 |
| 36 | KEGG_PATHWAY | hsa04664: Fc epsilon RI signaling pathway                      | 18 | 10.42967 | 5.18E-13 |
| 37 | KEGG_PATHWAY | hsa05031: Amphetamine addiction                                | 18 | 10.27851 | 6.72E-13 |
| 38 | KEGG_PATHWAY | hsa04540: Gap junction                                         | 19 | 8.507027 | 4.25E-12 |
| 39 | KEGG_PATHWAY | hsa05030: Cocaine addiction                                    | 15 | 12.06152 | 8.58E-12 |
| 40 | KEGG_PATHWAY | hsa04370: VEGF signaling pathway                               | 16 | 10.68501 | 9.78E-12 |
| 41 | KEGG_PATHWAY | hsa04917: Prolactin signaling pathway                          | 17 | 9.568806 | 1.14E-11 |
| 42 | KEGG_PATHWAY | hsa04915: Estrogen signaling pathway                           | 22 | 6.281313 | 2.61E-11 |
| 43 | KEGG_PATHWAY | hsa04014: Ras signaling pathway                                | 28 | 4.694583 | 2.88E-11 |
| 44 | KEGG_PATHWAY | hsa04921: Oxytocin signaling pathway                           | 23 | 5.88456  | 3.09E-11 |
| 45 | KEGG_PATHWAY | hsa04015: Rap1 signaling pathway                               | 26 | 4.878215 | 7.65E-11 |
| 46 | KEGG_PATHWAY | hsa05132: Salmonella infection                                 | 28 | 4.430631 | 1.11E-10 |
| 47 | KEGG_PATHWAY | hsa04920: Adipocytokine signaling pathway                      | 16 | 9.136456 | 1.11E-10 |
| 48 | KEGG_PATHWAY | hsa05230: Central carbon metabolism in cancer                  | 16 | 9.005935 | 1.38E-10 |
| 49 | KEGG_PATHWAY | hsa04919: Thyroid hormone signaling pathway                    | 20 | 6.512556 | 1.39E-10 |
| 50 | KEGG_PATHWAY | hsa04151: PI3K-Akt signaling pathway                           | 33 | 3.672971 | 2.18E-10 |
| 51 | KEGG_PATHWAY | hsa04932: Non-alcoholic fatty liver disease                    | 22 | 5.592395 | 2.47E-10 |
| 52 | KEGG_PATHWAY | hsa05212: Pancreatic cancer                                    | 16 | 8.29494  | 4.77E-10 |

|    |              |                                                    |    |          |          |
|----|--------------|----------------------------------------------------|----|----------|----------|
| 53 | KEGG_PATHWAY | hsa05170: Human immunodeficiency virus 1 infection | 25 | 4.64634  | 5.40E-10 |
| 54 | KEGG_PATHWAY | hsa05152: Tuberculosis                             | 23 | 5.034568 | 6.84E-10 |
| 55 | KEGG_PATHWAY | hsa04510: Focal adhesion                           | 24 | 4.704593 | 1.03E-09 |
| 56 | KEGG_PATHWAY | hsa05415: Diabetic cardiomyopathy                  | 24 | 4.658242 | 1.25E-09 |
| 57 | KEGG_PATHWAY | hsa05166: Human T-cell leukemia virus 1 infection  | 25 | 4.437046 | 1.40E-09 |
| 58 | KEGG_PATHWAY | hsa04713: Circadian entrainment                    | 17 | 6.905324 | 2.00E-09 |
| 59 | KEGG_PATHWAY | hsa04140: Autophagy - animal                       | 20 | 5.58879  | 2.03E-09 |
| 60 | KEGG_PATHWAY | hsa04936: Alcoholic liver disease                  | 20 | 5.549432 | 2.29E-09 |
| 61 | KEGG_PATHWAY | hsa04217: Necroptosis                              | 21 | 5.203901 | 2.57E-09 |
| 62 | KEGG_PATHWAY | hsa05210: Colorectal cancer                        | 16 | 7.330412 | 2.93E-09 |
| 63 | KEGG_PATHWAY | hsa05219: Bladder cancer                           | 12 | 11.53199 | 3.33E-09 |
| 64 | KEGG_PATHWAY | hsa05214: Glioma                                   | 15 | 7.880193 | 3.99E-09 |
| 65 | KEGG_PATHWAY | hsa04068: FoxO signaling pathway                   | 19 | 5.714644 | 4.01E-09 |
| 66 | KEGG_PATHWAY | hsa05142: Chagas disease                           | 17 | 6.566828 | 4.29E-09 |
| 67 | KEGG_PATHWAY | hsa04723: Retrograde endocannabinoid signaling     | 20 | 5.324455 | 4.65E-09 |
| 68 | KEGG_PATHWAY | hsa04072: Phospholipase D signaling pathway        | 20 | 5.324455 | 4.65E-09 |
| 69 | KEGG_PATHWAY | hsa04620: Toll-like receptor signaling pathway     | 17 | 6.440543 | 5.74E-09 |
| 70 | KEGG_PATHWAY | hsa04625: C-type lectin receptor signaling pathway | 17 | 6.440543 | 5.74E-09 |
| 71 | KEGG_PATHWAY | hsa05135: Yersinia infection                       | 19 | 5.464368 | 8.31E-09 |
| 72 | KEGG_PATHWAY | hsa04611: Platelet activation                      | 18 | 5.719495 | 1.14E-08 |
| 73 | KEGG_PATHWAY | hsa05131: Shigellosis                              | 25 | 3.987952 | 1.19E-08 |
| 74 | KEGG_PATHWAY | hsa04930: Type II diabetes mellitus                | 12 | 10.27851 | 1.26E-08 |
| 75 | KEGG_PATHWAY | hsa04380: Osteoclast differentiation               | 18 | 5.540761 | 1.86E-08 |
| 76 | KEGG_PATHWAY | hsa05231: Choline metabolism in cancer             | 16 | 6.432811 | 1.88E-08 |
| 77 | KEGG_PATHWAY | hsa05130: Pathogenic Escherichia coli infection    | 22 | 4.400108 | 2.05E-08 |
| 78 | KEGG_PATHWAY | hsa05223: Non-small cell lung cancer               | 14 | 7.661299 | 2.23E-08 |
| 79 | KEGG_PATHWAY | hsa01524: Platinum drug resistance                 | 14 | 7.55635  | 2.65E-08 |
| 80 | KEGG_PATHWAY | hsa05169: Epstein-Barr virus infection             | 22 | 4.291194 | 3.18E-08 |

|     |              |                                                                      |    |          |          |
|-----|--------------|----------------------------------------------------------------------|----|----------|----------|
| 81  | KEGG_PATHWAY | hsa05235: PD-L1 expression and PD-1 checkpoint pathway in cancer     | 15 | 6.640612 | 3.98E-08 |
| 82  | KEGG_PATHWAY | hsa05164: Influenza A                                                | 20 | 4.6083   | 5.13E-08 |
| 83  | KEGG_PATHWAY | hsa05222: Small cell lung cancer                                     | 15 | 6.424071 | 6.14E-08 |
| 84  | KEGG_PATHWAY | hsa04062: Chemokine signaling pathway                                | 21 | 4.309481 | 6.71E-08 |
| 85  | KEGG_PATHWAY | hsa04657: IL-17 signaling pathway                                    | 15 | 6.287388 | 8.13E-08 |
| 86  | KEGG_PATHWAY | hsa05020: Prion disease                                              | 25 | 3.608147 | 8.28E-08 |
| 87  | KEGG_PATHWAY | hsa05120: Epithelial cell signaling in Helicobacter pylori infection | 13 | 7.317322 | 1.44E-07 |
| 88  | KEGG_PATHWAY | hsa04724: Glutamatergic synapse                                      | 16 | 5.52996  | 1.50E-07 |
| 89  | KEGG_PATHWAY | hsa04621: NOD-like receptor signaling pathway                        | 20 | 4.282714 | 1.67E-07 |
| 90  | KEGG_PATHWAY | hsa04916: Melanogenesis                                              | 15 | 5.851629 | 2.05E-07 |
| 91  | KEGG_PATHWAY | hsa04914: Progesterone-mediated oocyte maturation                    | 15 | 5.79426  | 2.32E-07 |
| 92  | KEGG_PATHWAY | hsa04660: T cell receptor signaling pathway                          | 15 | 5.682832 | 2.97E-07 |
| 93  | KEGG_PATHWAY | hsa04910: Insulin signaling pathway                                  | 17 | 4.889171 | 3.07E-07 |
| 94  | KEGG_PATHWAY | hsa05133: Pertussis                                                  | 13 | 6.739639 | 3.67E-07 |
| 95  | KEGG_PATHWAY | hsa04371: Apelin signaling pathway                                   | 17 | 4.818823 | 3.75E-07 |
| 96  | KEGG_PATHWAY | hsa05162: Measles                                                    | 17 | 4.818823 | 3.75E-07 |
| 97  | KEGG_PATHWAY | hsa05160: Hepatitis C                                                | 18 | 4.517308 | 3.89E-07 |
| 98  | KEGG_PATHWAY | hsa05032: Morphine addiction                                         | 14 | 6.061687 | 3.95E-07 |
| 99  | KEGG_PATHWAY | hsa04929: GnRH secretion                                             | 12 | 7.387681 | 4.70E-07 |
| 100 | KEGG_PATHWAY | hsa05208: Chemical carcinogenesis - reactive oxygen species          | 21 | 3.710405 | 7.77E-07 |
| 101 | KEGG_PATHWAY | hsa05034: Alcoholism                                                 | 19 | 4.003307 | 1.02E-06 |
| 102 | KEGG_PATHWAY | hsa04261: Adrenergic signaling in cardiomyocytes                     | 17 | 4.465443 | 1.06E-06 |
| 103 | KEGG_PATHWAY | hsa04923: Regulation of lipolysis in adipocytes                      | 11 | 7.739476 | 1.10E-06 |
| 104 | KEGG_PATHWAY | hsa04218: Cellular senescence                                        | 17 | 4.293695 | 1.80E-06 |
| 105 | KEGG_PATHWAY | hsa04211: Longevity regulating pathway                               | 13 | 5.755197 | 2.10E-06 |
| 106 | KEGG_PATHWAY | hsa05165: Human papillomavirus infection                             | 25 | 2.975904 | 2.83E-06 |
| 107 | KEGG_PATHWAY | hsa04550: Signaling pathways regulating pluripotency of stem cells   | 16 | 4.4085   | 2.89E-06 |

|     |              |                                                               |    |          |          |
|-----|--------------|---------------------------------------------------------------|----|----------|----------|
| 108 | KEGG_PATHWAY | hsa04960: Aldosterone-regulated sodium reabsorption           | 9  | 9.584019 | 2.97E-06 |
| 109 | KEGG_PATHWAY | hsa05171: Coronavirus disease - COVID-19                      | 20 | 3.396635 | 5.76E-06 |
| 110 | KEGG_PATHWAY | hsa05211: Renal cell carcinoma                                | 11 | 6.281313 | 7.87E-06 |
| 111 | KEGG_PATHWAY | hsa04150: mTOR signaling pathway                              | 16 | 4.041125 | 8.51E-06 |
| 112 | KEGG_PATHWAY | hsa04064: NF-kappa B signaling pathway                        | 13 | 4.925121 | 1.10E-05 |
| 113 | KEGG_PATHWAY | hsa05012: Parkinson disease                                   | 21 | 3.110603 | 1.18E-05 |
| 114 | KEGG_PATHWAY | hsa05213: Endometrial cancer                                  | 10 | 6.79327  | 1.28E-05 |
| 115 | KEGG_PATHWAY | hsa04928: Parathyroid hormone synthesis, secretion and action | 13 | 4.832194 | 1.34E-05 |
| 116 | KEGG_PATHWAY | hsa05203: Viral carcinogenesis                                | 18 | 3.476556 | 1.45E-05 |
| 117 | KEGG_PATHWAY | hsa04659: Th17 cell differentiation                           | 13 | 4.742709 | 1.62E-05 |
| 118 | KEGG_PATHWAY | hsa05225: Hepatocellular carcinoma                            | 16 | 3.752473 | 2.08E-05 |
| 119 | KEGG_PATHWAY | hsa05226: Gastric cancer                                      | 15 | 3.96654  | 2.23E-05 |
| 120 | KEGG_PATHWAY | hsa04666: Fc gamma R-mediated phagocytosis                    | 12 | 4.874346 | 3.04E-05 |
| 121 | KEGG_PATHWAY | hsa04925: Aldosterone synthesis and secretion                 | 12 | 4.824608 | 3.35E-05 |
| 122 | KEGG_PATHWAY | hsa05221: Acute myeloid leukemia                              | 10 | 5.880741 | 4.22E-05 |
| 123 | KEGG_PATHWAY | hsa05146: Amoebiasis                                          | 12 | 4.635408 | 4.87E-05 |
| 124 | KEGG_PATHWAY | hsa04911: Insulin secretion                                   | 11 | 5.039658 | 5.64E-05 |
| 125 | KEGG_PATHWAY | hsa05017: Spinocerebellar ataxia                              | 14 | 3.857437 | 6.21E-05 |
| 126 | KEGG_PATHWAY | hsa04922: Glucagon signaling pathway                          | 12 | 4.4188   | 7.59E-05 |
| 127 | KEGG_PATHWAY | hsa04022: cGMP-PKG signaling pathway                          | 15 | 3.539009 | 7.91E-05 |
| 128 | KEGG_PATHWAY | hsa05134: Legionellosis                                       | 9  | 6.221205 | 8.25E-05 |
| 129 | KEGG_PATHWAY | hsa05224: Breast cancer                                       | 14 | 3.752473 | 8.27E-05 |
| 130 | KEGG_PATHWAY | hsa05206: MicroRNAs in cancer                                 | 21 | 2.669098 | 1.05E-04 |
| 131 | KEGG_PATHWAY | hsa04730: Long-term depression                                | 9  | 5.910145 | 1.20E-04 |
| 132 | KEGG_PATHWAY | hsa04213: Longevity regulating pathway - multiple species     | 9  | 5.719495 | 1.51E-04 |
| 133 | KEGG_PATHWAY | hsa04662: B cell receptor signaling pathway                   | 10 | 4.804996 | 2.09E-04 |
| 134 | KEGG_PATHWAY | hsa05216: Thyroid cancer                                      | 7  | 7.454237 | 2.92E-04 |
| 135 | KEGG_PATHWAY | hsa04742: Taste transduction                                  | 10 | 4.581508 | 3.00E-04 |
| 136 | KEGG_PATHWAY | hsa04613: Neutrophil extracellular trap formation             | 15 | 3.110603 | 3.10E-04 |
| 137 | KEGG_PATHWAY | hsa04650: Natural killer cell mediated cytotoxicity           | 12 | 3.752473 | 3.27E-04 |

|     |              |                                                    |    |          |          |
|-----|--------------|----------------------------------------------------|----|----------|----------|
| 138 | KEGG_PATHWAY | hsa04310: Wnt signaling pathway                    | 14 | 3.244785 | 3.55E-04 |
| 139 | KEGG_PATHWAY | hsa04622: RIG-I-like receptor<br>signaling pathway | 9  | 5.065839 | 3.56E-04 |
| 140 | KEGG_PATHWAY | hsa04810: Regulation of actin<br>cytoskeleton      | 16 | 2.891814 | 3.94E-04 |
| 141 | KEGG_PATHWAY | hsa05218: Melanoma                                 | 9  | 4.925121 | 4.32E-04 |
| 142 | KEGG_PATHWAY | hsa04934: Cushing syndrome                         | 13 | 3.304597 | 5.34E-04 |
| 143 | KEGG_PATHWAY | hsa04270: Vascular smooth muscle<br>contraction    | 12 | 3.528445 | 5.56E-04 |
| 144 | KEGG_PATHWAY | hsa05220: Chronic myeloid<br>leukemia              | 9  | 4.665904 | 6.25E-04 |
| 145 | KEGG_PATHWAY | hsa05140: Leishmaniasis                            | 9  | 4.605308 | 6.82E-04 |
| 146 | KEGG_PATHWAY | hsa04152: AMPK signaling<br>pathway                | 11 | 3.611755 | 8.79E-04 |
| 147 | KEGG_PATHWAY | hsa00330: Arginine and proline<br>metabolism       | 7  | 5.516135 | 0.001518 |
| 148 | KEGG_PATHWAY | hsa04924: Renin secretion                          | 8  | 4.568228 | 0.001696 |
| 149 | KEGG_PATHWAY | hsa04114: Oocyte meiosis                           | 11 | 3.308478 | 0.001718 |
| 150 | KEGG_PATHWAY | hsa04727: GABAergic synapse                        | 9  | 3.984367 | 0.001769 |
| 151 | KEGG_PATHWAY | hsa05016: Huntington disease                       | 18 | 2.317704 | 0.001854 |
| 152 | KEGG_PATHWAY | hsa04520: Adherens junction                        | 8  | 4.439545 | 0.002003 |
| 153 | KEGG_PATHWAY | hsa04658: Th1 and Th2 cell<br>differentiation      | 9  | 3.854442 | 0.002186 |
| 154 | KEGG_PATHWAY | hsa05143: African trypanosomiasis                  | 6  | 6.389346 | 0.00221  |
| 155 | KEGG_PATHWAY | hsa04670: Leukocyte<br>transendothelial migration  | 10 | 3.456225 | 0.002304 |
| 156 | KEGG_PATHWAY | hsa04115: p53 signaling pathway                    | 8  | 4.317914 | 0.002353 |
| 157 | KEGG_PATHWAY | hsa04630: JAK-STAT signaling<br>pathway            | 12 | 2.91859  | 0.002613 |
| 158 | KEGG_PATHWAY | hsa04971: Gastric acid secretion                   | 8  | 4.14747  | 0.002962 |
| 159 | KEGG_PATHWAY | hsa05033: Nicotine addiction                       | 6  | 5.910145 | 0.003138 |
| 160 | KEGG_PATHWAY | hsa00380: Tryptophan metabolism                    | 6  | 5.628709 | 0.003895 |
| 161 | KEGG_PATHWAY | hsa05014: Amyotrophic lateral<br>sclerosis         | 19 | 2.056644 | 0.004824 |
| 162 | KEGG_PATHWAY | hsa04360: Axon guidance                            | 12 | 2.597866 | 0.006332 |
| 163 | KEGG_PATHWAY | hsa04970: Salivary secretion                       | 8  | 3.426171 | 0.00847  |
| 164 | KEGG_PATHWAY | hsa04137: Mitophagy - animal                       | 7  | 3.830649 | 0.00945  |

---

**Table S6.** Acute toxicity of humantenirien in ICR male and female mice.

| Male (n=5) |                             |       | Female (n=5) |                             |       |
|------------|-----------------------------|-------|--------------|-----------------------------|-------|
| Group      | Dose (mg·kg <sup>-1</sup> ) | Death | Group        | Dose (mg·kg <sup>-1</sup> ) | Death |
| 1          | 0.1                         | 0     | 1            | 0.045                       | 0     |
| 2          | 0.12                        | 0     | 2            | 0.056                       | 1     |
| 3          | 0.13                        | 1     | 3            | 0.069                       | 3     |
| 4          | 0.16                        | 3     | 4            | 0.086                       | 3     |
| 5          | 0.18                        | 5     | 5            | 0.11                        | 5     |

**Table S7.** The LD<sub>50</sub> of *Gelsemium* alkaloids in mice.

| Compounds                       | Animals | Route | LD <sub>50</sub> (mg/kg) | Reference |
|---------------------------------|---------|-------|--------------------------|-----------|
| 19 $\alpha$ -Hydroxygelsamydine | -       | -     | -                        | -         |
| Gelseiridone                    | -       | -     | -                        | -         |
| 14-Dehydroxygelsefuranidine     | -       | -     | -                        | -         |
| Humantenirine                   | Mice    | i.p.  | 0.149                    | -         |
| Gelsenicine                     | Mice    | i.p.  | 0.185                    | [1]       |
| 14-Hydroxygelsenicine           | Mice    | p.o.  | 0.295                    | [2]       |
| Humantendine                    | Mice    | i.p.  | 0.21                     | [3]       |
| Gelsemine                       | Mice    | i.p.  | 56.2                     | [4]       |
| Koumine                         | Mice    | s.c.  | 99                       | [4]       |
| Koumidine                       | Mice    | i.p.  | >125                     | [4]       |



## References

1. Du, X.B., Y.H. Dai, C.L. Zhang, et al., *Studies on the Gelsemium Alkaloids—— I . The structure of Gelsenicine* Acta Chim. Sinica, 1982(12) p.(1137-1141).
2. Yang, S., Y. Liu, F. Sun, et al., *Gelsedine-type alkaloids: Discovery of natural neurotoxins presented in toxic honey*. J. Hazard. Mater., 2020. **381** p.(120999). DOI: 10.1016/j.jhazmat.2019.120999.
3. Zhou, Y.P., W. Xu, and X.Y. Chen, *Toxicity and respiratory inhibition of humantemine*. Chin. J. Pharmacol. Toxicol., 1995. **9**(01) p.(69-72).
4. Jin, G.L., Y.P. Su, M. Liu, et al., *Medicinal plants of the genus Gelsemium (Gelsemiaceae, Gentianales) – a review of their phytochemistry, pharmacology, toxicology and traditional use*. J. Ethnopharmacol., 2014. **152**(1) p.(33-52). DOI: 10.1016/j.jep.2014.01.003.
